1 **Title:**

2

3 Longitudinal analysis of naturally acquired antibodies to PfEMP1 CIDR domain variants and their  
4 association with malaria protection

5

6 **Authors:**

7

8 Nyamekye Obeng-Adjei<sup>1,2\*</sup>, Daniel B. Larremore<sup>3,4\*</sup>, Louise Turner<sup>5</sup>, Aissata Ongoiba<sup>6</sup>, Shanping  
9 Li<sup>1</sup>, Safiatou Doumbo<sup>6</sup>, Takele B. Yazew<sup>7</sup>, Kassoum Kayentao<sup>6</sup>, Louis H. Miller<sup>8</sup>, Boubacar Traore<sup>6</sup>,  
10 Susan K. Pierce<sup>7</sup>, Caroline O. Buckee<sup>9</sup>, Thomas Lavstsen<sup>5</sup>, Peter D. Crompton<sup>1</sup>, Tuan M. Tran<sup>1,10,11</sup>

11

12 \*Both authors contributed equally.

13

14 Corresponding author:

15 Tuan M. Tran ([tuantran@iu.edu](mailto:tuantran@iu.edu))

16

17 **Affiliations:**

18

19 1. Malaria Infection Biology and Immunity Section, Laboratory of Immunogenetics,  
20 National Institute of Allergy and Infectious Diseases, National Institutes of Health,  
21 Rockville, Maryland, USA

22 2. Innate Immunity Research Unit, GlaxoSmithKline, Collegeville, Pennsylvania, USA

23 3. Department of Computer Science, University of Colorado Boulder, Boulder, Colorado,  
24 USA

25 4. BioFrontiers Institute, University of Colorado Boulder, Boulder, Colorado, 80303, USA

26 5. Centre for Medical Parasitology, Department of Immunology & Microbiology, University  
27 of Copenhagen and Department of Infectious Diseases, Rigshospitalet, 1017  
28 Copenhagen, Denmark

29 6. Mali International Center of Excellence in Research, University of Sciences, Technique  
30 and Technology of Bamako, Bamako, Mali

31 7. Laboratory of Immunogenetics, National Institute of Allergy and Infectious Diseases,  
32 National Institutes of Health, Rockville, Maryland, USA

33 8. Laboratory of Malaria and Vector Research, National Institute of Allergy and Infectious  
34 Diseases, National Institutes of Health, Rockville, Maryland, USA

35 9. Center for Communicable Disease Dynamics, Department of Epidemiology, Harvard T. H.  
36 Chan School of Public Health, Boston, Massachusetts, USA

37 10. Division of Infectious Diseases, Department of Medicine, Indiana University School of  
38 Medicine, Indianapolis, Indiana, USA

39 11. Ryan White Center for Pediatric Infectious Disease and Global Health, Department of  
40 Pediatrics, Indiana University School of Medicine, Indianapolis, Indiana, USA

41 **ABSTRACT**

42 Malaria pathogenicity is determined, in part, by the adherence of *Plasmodium falciparum*  
43 infected erythrocytes to the microvasculature mediated via specific interactions between  
44 PfEMP1 variant domains to host endothelial receptors. Naturally acquired antibodies against  
45 specific PfEMP1 variants can play an important role in clinical protection against malaria. We  
46 evaluated IgG responses against a repertoire of PfEMP1 CIDR domain variants to determine the  
47 rate and order of variant-specific antibody acquisition and their association with protection  
48 against febrile malaria in a prospective cohort study conducted in an area of intense, seasonal  
49 malaria transmission. Using longitudinal data, we found that IgG to the pathogenic domain  
50 variants CIDR $\alpha$ 1.7 and CIDR $\alpha$ 1.8 were acquired the earliest. Furthermore, IgG to CIDR $\gamma$ 3 was  
51 associated with reduced prospective risk of febrile malaria and recurrent malaria episodes.  
52 Future studies will need to validate these findings in other transmission settings and determine  
53 the functional activity of these naturally acquired CIDR variant-specific antibodies.

54

## 55 INTRODUCTION

56 Malaria due to *Plasmodium falciparum* causes greater than 400,000 deaths per annum<sup>1</sup>.  
57 Severe clinical manifestations of *P. falciparum* malaria are precipitated by widespread  
58 sequestration of infected erythrocytes (IEs) in host microvasculature including in the brain and  
59 placenta which can lead to cerebral malaria and placental malaria, respectively<sup>2</sup>. Cytoadherence  
60 of IEs occurs via specific interactions between host endothelial receptors and *P. falciparum*  
61 erythrocyte membrane protein (PfEMP1), a parasite-derived protein expressed on the surface of  
62 IEs that is a major target of naturally acquired immunity to malaria<sup>3,4,5</sup>. The PfEMP1 adhesins are  
63 encoded by ~60 *var* gene variants that differ within and between parasite genomes and that are  
64 expressed in a mutually exclusive manner within each IE<sup>6,7,8</sup>. Switching between *var* genes aids  
65 in parasite immune evasion and functional diversification of the PfEMP1 family have resulted in  
66 mutually exclusive receptor binding phenotypes correlated to differences in clinical severity<sup>9,10</sup>.

67 Members of the PfEMP1 family vary in the size and number of extracellular Duffy-binding-  
68 like (DBL) and cysteine-rich interdomain region (CIDR) domains<sup>11</sup>. DBL and CIDR domains are  
69 classified based on sequence similarity into six ( $\alpha$ ,  $\beta$ ,  $\gamma$ ,  $\delta$ ,  $\epsilon$ ,  $\xi$ ) and four ( $\alpha$ ,  $\beta$ ,  $\gamma$ ,  $\delta$ ) main classes,  
70 respectively, of which some can be further divided into sub-classes (e.g. CIDR $\alpha$ 1.1)<sup>12,13</sup>. PfEMP1  
71 generally have a semi-conserved head structure near the N-terminus consisting of a tandem  
72 DBL $\alpha$ -CIDR domain. This can be followed by a second DBL $\delta$ -CIDR tandem domain or additional  
73 other types of DBL domains in larger proteins. Notably, however, the VAR2CSA PfEMP1 variants  
74 do not contain typical CIDR domains and bind placental chondroitin sulfate A via specialized DBL  
75 domains<sup>14,15</sup>. PfEMP1 have diversified to either bind endothelial protein C receptor (EPCR)<sup>10</sup>, the  
76 scavenger receptor CD36<sup>16</sup> or yet undermined receptors via their head structure CIDR domains.

77 These phenotypes are maintained by the chromosomal organization of the *var* genes<sup>17</sup>. Among  
78 the subtelomeric *var* genes, Group A genes transcribed toward the telomere encode DBL $\alpha$ 1-  
79 CIDR $\alpha$ 1 head structures binding to EPCR or DBL $\alpha$ 1-CIDR $\beta/\gamma/\delta$  head structures with unknown  
80 endothelial receptor specificities. Subtelomeric Group B *var* genes transcribed toward the  
81 centromere as well as centromeric Group C *var* genes encode DBL $\alpha$ 0-CIDR $\alpha$ 2-6 head-structures  
82 binding to CD36. In addition to this, chimeric group B/A *var* genes encode EPCR-binding DBL $\alpha$ 0-  
83 CIDR $\alpha$ 1 head structures. The EPCR-binding phenotype has been implicated in severe malaria<sup>18, 19,</sup>  
84 <sup>20, 21</sup>, whereas CD36 binding has been associated with uncomplicated malaria<sup>22, 23</sup>. Severe malaria  
85 has been associated with rosetting, a phenomenon which involves binding between an IE and  
86 several uninfected erythrocytes but with unclear clinical significance. A set of group A PfEMP1  
87 with DBL $\alpha$ 1-CIDR $\beta/\gamma/\delta$  domains have been shown to mediate rosettes.

88 Immunity to severe malaria is generally acquired after only one to two severe episodes<sup>24</sup> with  
89 naturally acquired antibodies specific for PfEMP1 variants likely playing an important role in  
90 clinical protection<sup>25</sup>. Antibodies to group A PfEMP1 variants tend to be acquired prior to  
91 antibodies to group B and C variants<sup>26</sup> and are associated with protection from severe malaria<sup>27</sup>.  
92 Similarly, antibodies to EPCR-binding CIDR $\alpha$ 1 domains are acquired more rapidly than antibodies  
93 to other CIDR domains in areas of high malaria transmission intensity and are boosted by severe  
94 malaria but not uncomplicated malaria<sup>28, 29</sup>. However, a recent study showed that antibodies to  
95 both rosetting-associated DBL $\alpha$  variants and CD36-binding CIDR domains predicted reduced risk  
96 of severe malaria to a similar extent as antibodies to EPCR-binding CIDR domains<sup>30</sup>. The same  
97 study also showed that antibodies to group 2 DBL $\alpha$  variants, which are associated with  
98 rosetting<sup>31</sup>, also predicted protection from uncomplicated malaria.

99 To gain further insight into the role of PfEMP1-variant specific antibodies, we assessed IgG  
100 responses against a repertoire of PfEMP1 CIDR domains to determine the rate and order of  
101 variant-specific antibody acquisition and their association with protection against uncomplicated  
102 febrile malaria in a prospective cohort study conducted in a Malian village with intense and  
103 seasonal malaria transmission.

## 104 RESULTS

### 105 IgG specific for CIDR $\alpha$ 1, CIDR $\delta$ , and CIDR $\gamma$ domain variants are acquired rapidly.

106 Naturally acquired IgG antibody responses to 35 PfEMP1 CIDR domain variants representing  
107 subtypes  $\alpha$ ,  $\gamma$  and  $\delta$  CIDR, as well as three well-studied *P. falciparum* antigens (circumsporozoite  
108 protein [PfCSP], apical membrane protein 1 [PfAMA1], and merozoite surface protein 1  
109 [PfMSP1]), tetanus toxoid (non-malaria positive control), and bovine serum albumin (non-specific  
110 background control; Table S1) were determined by multiplex bead-based immunoassay in 680  
111 children and adults from the Kalifabougou, Mali cohort at their healthy baseline in May 2011 (Fig.  
112 S1). Hierarchical clustering of baseline PfEMP1-specific IgG reactivity revealed distinct clustering  
113 of samples by age, and by the presence of PCR-documented, asymptomatic *P. falciparum*  
114 infection; as well as clustering of antigen targets by group (A, B, or B/A), binding phenotype  
115 (EPCR, CD36, or unknown), and CIDR domain class (Fig. 1a); suggesting differential rates of  
116 acquisition of IgG between PfEMP1 variants with cumulative *P. falciparum* exposure and the  
117 acquisition of clinical immunity to malaria. PfEMP1-specific IgG reactivity increased rapidly up to  
118 8 years of age, and within each age stratum, *P. falciparum* PCR-positive individuals exhibited  
119 greater variant-specific IgG reactivity than uninfected individuals (Fig. 1b).

**Fig. 1. IgG antibodies to PfEMP-1 variants belonging to the A or B/A groups or having the EPCR-binding phenotype are rapidly acquired during childhood.**

**a** Hierarchical clustering heatmap showing IgG reactivity to each of the 35 PfEMP-1 variants in 680 subjects at enrollment (May 2011 healthy baseline). Clustering was performed using the Ward.D method and the Pearson distance metric. AU refers to arbitrary concentration units, which was calculated by fitting data to a dilutional standard curve of pooled hyper-immune plasma from malaria-exposed Malian adults. **b-c** IgG reactivity obtained at May 2011 healthy baseline versus age for each PfEMP-1 variant (solid lines) or grouped by CIDR domain class (dashed lines) with loess fit curves and 95% confidence intervals. Control antigens shown as dotted colored lines. **d** Linear portion of plot in **b** (age range 3 months to 8 years) with linear fit curves and 95% confidence intervals (see Table S2). For comparison, regression line for all variants together is represented by the black dotted line.

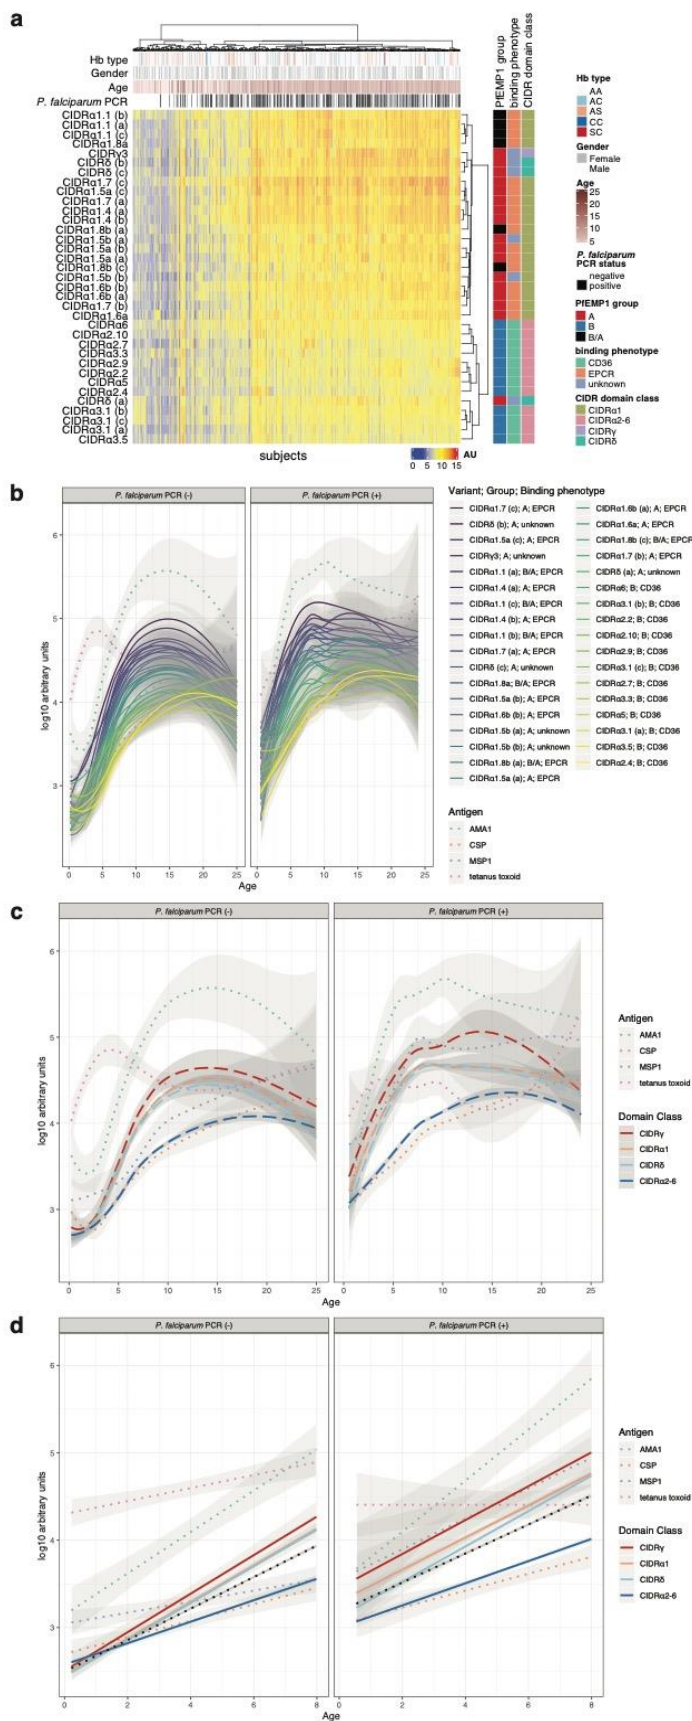

121 Categorization of PfEMP-1 variants by CIDR domain class suggested that the acquisition of  
122 IgG specific for variants in the CIDR $\gamma$ , CIDR $\alpha$ 1, and CIDR $\delta$  classes were acquired rapidly whereas  
123 IgG specific for group B variants of the CIDR $\alpha$ 2-6 class were acquired slowly irrespective of *P.*  
124 *falciparum* infection status (Fig. 1c). Indeed, when compared to variants of other domain classes  
125 within the linear range of the fit curves (<8 years of age), IgG specific for variants within each of  
126 the CIDR $\gamma$ , CIDR $\alpha$ 1, and CIDR $\delta$  classes increased significantly more rapidly with age, whereas IgG  
127 specific for variants of the CIDR $\alpha$ 2-6 classes increased significantly more slowly with age,  
128 independent of *P. falciparum* infection status (Fig. 1d and Table S2). Of note, IgG specific for  
129 AMA1, CSP, and MSP1 increased predictably with age in early childhood and plateaued in  
130 adolescence or young adulthood, which is similar to what we previously observed in this cohort  
131 <sup>32, 33</sup> (Fig. 1b-c). As we observed previously by ELISA in a separate cohort in Mali <sup>34</sup>, increases in  
132 tetanus toxoid-specific IgG in early childhood and adolescence corresponds with the primary  
133 childhood vaccine series (diphtheria, tetanus, pertussis) and a subsequent booster of a tetanus  
134 toxoid-containing vaccine in females of child-bearing age (Fig. 1b-c).

135 With the exclusion of children <6 months of age whose IgG is most likely maternally derived,  
136 ranking of antigens by decreasing seropositivity within each age group revealed  
137 immunodominance of CIDR $\alpha$ 1, CIDR $\delta$ , and CIDR $\gamma$  domain classes, which are all either of the A or  
138 B/A *var* group, in early childhood (<7 years) that is maintained to a large degree in adolescence  
139 and early adulthood (Fig. S2). Notably, the most prevalent PfEMP1-specific IgG reactivity among  
140 individuals greater than 1 year of age was against CIDR $\alpha$ 1.7(c) with seroprevalence rapidly rising  
141 from 25% in 2 to 3-year-old children to 60% in 4 to 6-year-old children and surpassing 95% in  
142 older children and adults (Fig. S2). However, the majority of individuals within the oldest age



143 group (15-25 years) were also seropositive for several variants within the CIDRa2-6 domain  
 144 classes, suggesting that IgG antibodies against these variants are eventually acquired with  
 145 additional years of malaria exposure.

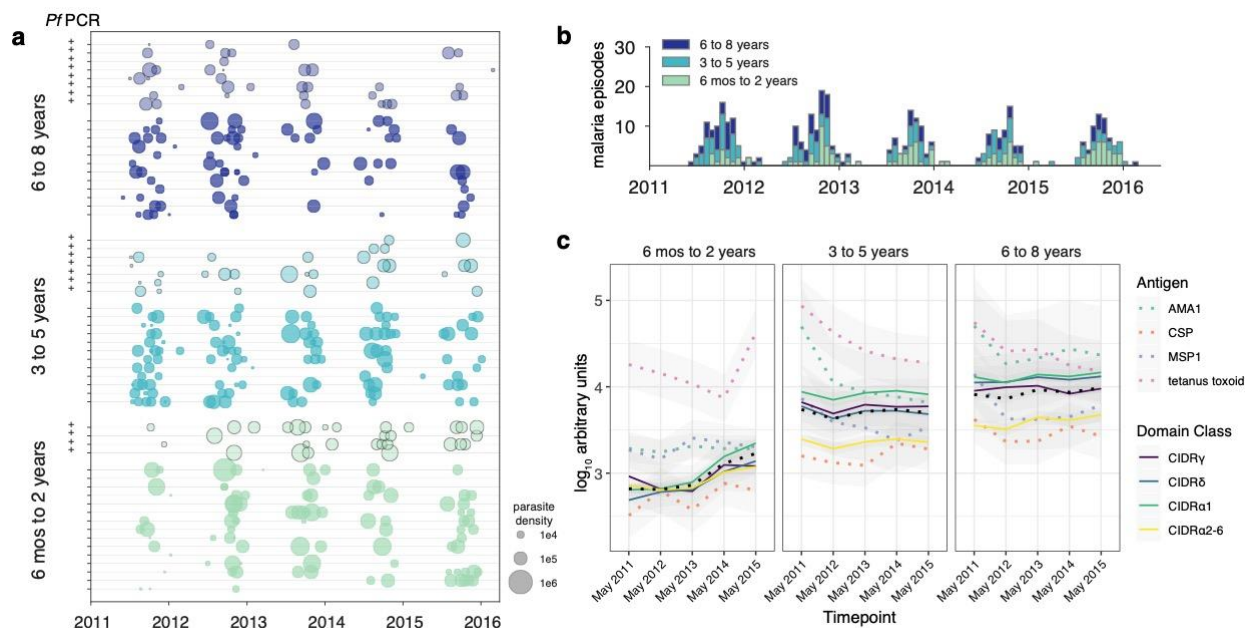

146

147 **Fig. 2. Longitudinal analysis of PfEMP-1 variant-specific IgG over multiple malaria seasons.**

148  
 149 IgG reactivity specific to PfEMP-1 variants were determined for 60 children ages 6 months to 8 years (see  
 150 **Figure S1**) at five cross-sectional surveys prior to the malaria season. **a** Malaria incidence over five malaria  
 151 seasons for 60 children in children aged 6 months to 2 years; 3 to 5 years; and 6 to 8 years ( $n = 20$  per age  
 152 group). Plus (+) signs in the left margin indicate subjects with asymptomatic *P. falciparum* parasitemia at  
 153 enrollment. Size of bubble is proportional to parasite density determined at each visit. **b** Number of  
 154 malaria episodes per two-week period by age group over five malaria seasons. **c** Longitudinal IgG reactivity  
 155 at five cross-sectional surveys in the same children. Color scale for variant is ordered by slopes estimated  
 156 from cross-sectional data (**Table S2**) to facilitate comparison.

157

158 To assess the longitudinal acquisition of variant-specific IgG, we determined variant-specific  
 159 IgG reactivity across five annual cross-sectional surveys conducted just prior to each malaria  
 160 transmission season for an age-stratified random sample of 60 children from the entire cohort  
 161 (**Fig. S1**). Children in this subset experienced a median of 6 febrile malaria episodes (interquartile  
 162 range, 4–9 episodes) with a broad range of parasite densities and distributed widely but with



163 clear seasonal peaks in the number of episodes during the five-year surveillance period (Fig. 2a-  
164 b). In the youngest children (6 months to 2 years), IgG specific for variants of the CIDR $\alpha$ 1 and  
165 CIDR $\delta$  domain classes began low and then increased rapidly over four malaria seasons, whereas  
166 IgG specific for CIDR $\gamma$  initially decreased during the first two years before rising during the third  
167 year of surveillance (Fig. 2c). In contrast, older children (3 to 8 years) appeared to maintain stable  
168 levels of IgG specific for all PfEMP1 variants over four malaria seasons (Fig. 2c).

169 **Acquisition of IgG antibodies to CIDR domain classes is highly ordered with IgG against EPCR-**  
170 **binding domain variants CIDR $\alpha$ 1.7 and CIDR $\alpha$ 1.8 acquired first.**

171 We next asked whether IgG antibodies to individual PfEMP1 variants were acquired in a particular  
172 order. Here we used an approach called *minimum violations ranking* (MVR), where an algorithm  
173 searches over different possible orders of acquisition of antibodies to PfEMP1 variants such that,  
174 if a particular an order is assumed for each child, the number of order violations observed in the  
175 data overall is minimized (refer to methods). We observed significantly less violations if we  
176 assumed an ordered acquisition of antibodies compared to a model with randomized  
177 seroconversion orders for each child, which highly suggests a hierarchical exposure to different  
178 parasite CIDR domains in this population (Fig. 3a-d). At the variant level, IgG specific to  
179 CIDR $\alpha$ 1.7(c) was acquired first followed by IgG to CIDR $\alpha$ 1.8b(a), CIDR $\alpha$ 1.8b(c), CIDR $\alpha$ 1.7(a),  
180 CIDR $\alpha$ 6, and CIDR $\gamma$ 3 (Fig. 3a). Grouped by CIDR domain class, IgG was acquired against CIDR $\gamma$  first  
181 followed by CIDR $\alpha$ 1, CIDR $\delta$ , and CIDR $\alpha$ 2-6 (Fig. 3b). Grouped on the basis of upstream sequence,  
182 IgG was acquired against B/A first followed by A and B (Fig. 3c). Lastly, when variants were  
183 grouped by binding phenotype, IgG against EPCR-binding domains were acquired first followed

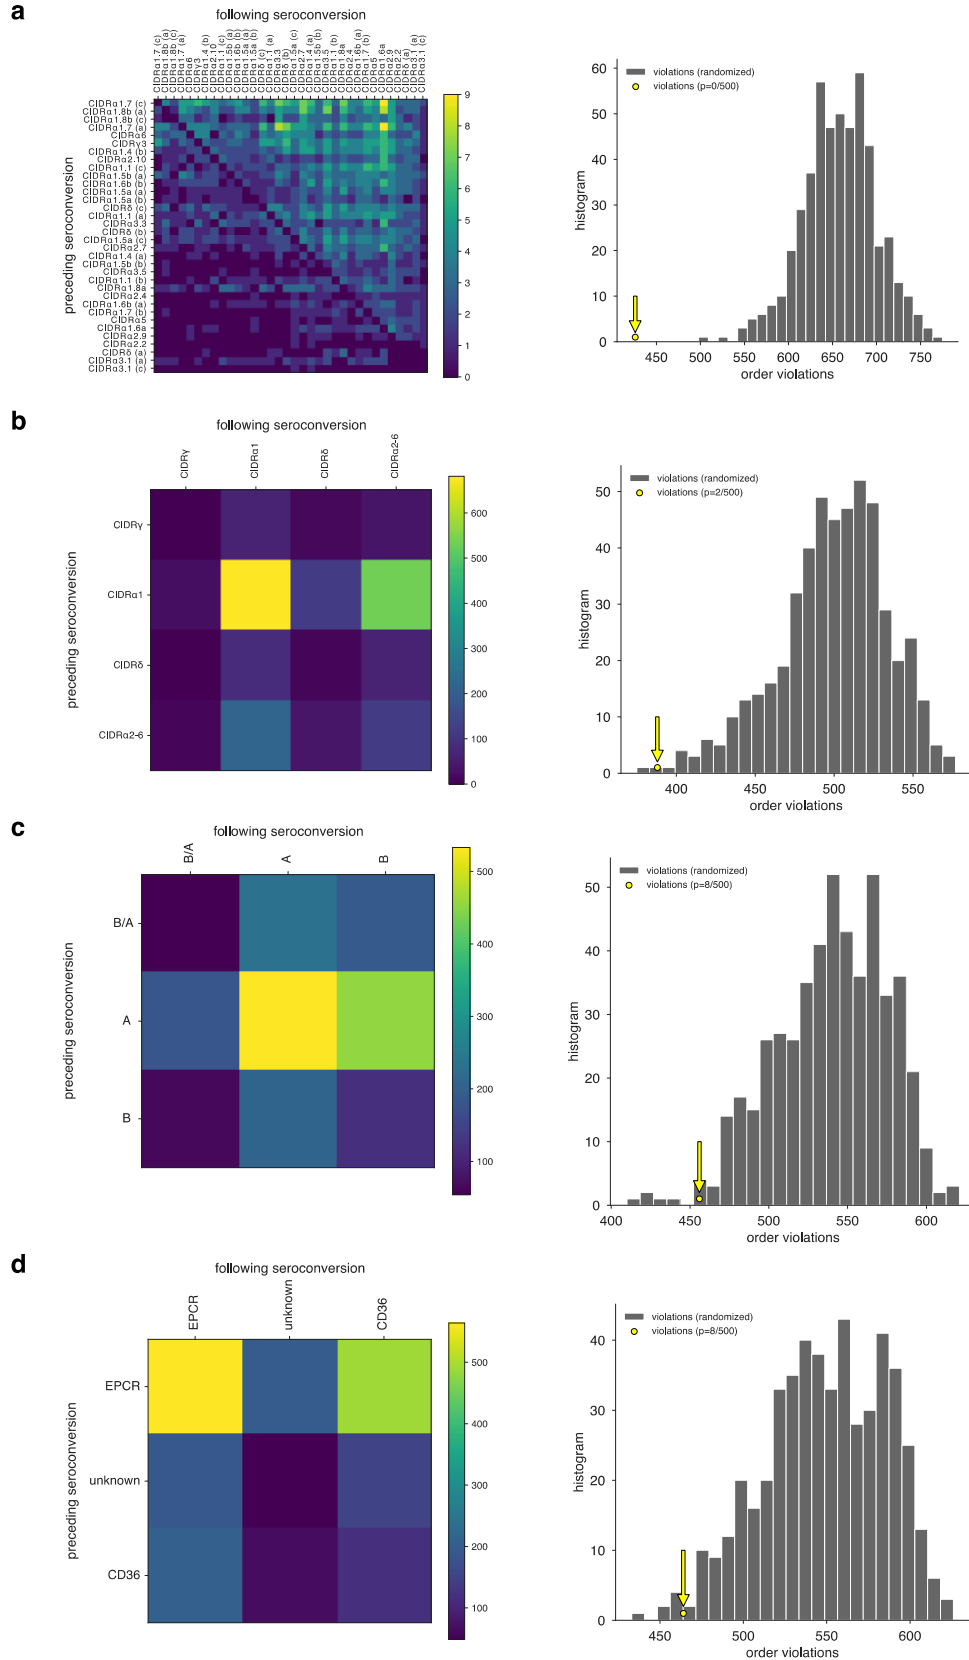

185 **Fig. 3. Acquisition of IgG to PfEMP-1 variants over time is hierarchical.**

186 Using longitudinal data, seropositivity was determined for each variant within each subject at each time  
187 point to determine the year of seroconversion. Seroconversion year was then used to generate a matrix  
188 representing the number of times that seroconversion for a variant (rows) precedes another variant  
189 (column) across all subjects. To find consensus ordering, the matrix was sorted to minimize the number  
190 of violations. Observed consensus ordering was compared against 200 independent procedures in which  
191 the seroconversion orders for each subject was randomized and consensus ordering was carry out in the  
192 same manner (right panel). Analysis was performed at the level of **a** individual variants, **b** CIDR domain  
193 class, **c** upstream sequence group, and **d** binding phenotype.  
194

195 by domains with unknown binding phenotypes and CD36-binding domains (**Fig. 3d**). Whether  
196 this reflects differential prevalence of variants in the parasite population or age-specific  
197 expression patterns remains an open question.

198 **CIDR $\gamma$ -specific IgG associates with protection from uncomplicated, febrile malaria.**

199 We focused on the risk of uncomplicated malaria given that severe malaria was rarely observed  
200 in the Kalifabougou cohort due to early diagnosis and treatment. We specifically evaluated  
201 whether baseline seropositivity for each variant could predict protection from febrile malaria  
202 after subsequent PCR-confirmed *P. falciparum* parasitemia in individuals who began the study  
203 PCR-negative using a Cox regression model that included age, presence of the malaria-protective  
204 HbS allele, gender, IgG reactivity to AMA1 (as a surrogate for prior malaria exposure), and  
205 seropositivity to each of the 35 PfEMP-1 variants as covariates. Notably, seropositivity to CIDR $\gamma$ 3  
206 (IT4var08), which has an unknown binding phenotype was significantly associated with reduced  
207 risk of febrile malaria (**Table 1**). CIDR $\gamma$  domains have been associated with rosetting of  
208 erythrocytes<sup>11</sup>, a phenomenon associated with severe forms of malaria<sup>35</sup> except in individuals  
209 with blood group O erythrocytes which appear to exhibit reduced rosetting<sup>36</sup>. We therefore  
210 hypothesized that the reduced risk afforded by CIDR $\gamma$ -specific IgG might occur via the inhibition  
211 of rosette formation and may therefore be negatively affected by blood group O. When included

212 **Table 1. Relationship between CIDR variant seropositivity and protection from febrile malaria.**

| Variant      | Number seropositive (N=271) | Alternate name | PfEMP1 group | Binding Phenotype | Genome/ Isolate | HR    | LCI    | UCI   | P value |
|--------------|-----------------------------|----------------|--------------|-------------------|-----------------|-------|--------|-------|---------|
| CIDRy3       | 129                         | IT4var08       | A            | unknown           | IT4             | 0.607 | 0.42   | 0.876 | 0.00763 |
| CIDRα3.1 (a) | 17                          | DD2var01       | B            | CD36              | DD2             | 0.208 | 0.0523 | 0.828 | 0.0259  |
| CIDRα3.3     | 55                          | IT4var26       | B            | CD36              | IT4             | 0.806 | 0.458  | 1.42  | 0.454   |
| CIDRα2.10    | 37                          | IT4var30       | B            | CD36              | IT4             | 0.861 | 0.507  | 1.46  | 0.58    |
| CIDRα2.9     | 25                          | IT4var45       | B            | CD36              | IT4             | 0.83  | 0.429  | 1.6   | 0.58    |

213 Results of Cox regression model assessing PfEMP1 variant-specific IgG on the risk of febrile malaria after incident *P.*  
 214 *falciparum* infection in which covariates were age, gender, presence of the HbS allele, and IgG seropositivity for five  
 215 CIDR variants selected using the least absolute shrinkage and selection operator (LASSO; refer to Methods). Analysis  
 216 was restricted to subjects who were at least 6 months of age and began the study negative for *P. falciparum*  
 217 by PCR (271 subjects). Malaria risk was determined based on time to clinical malaria, defined as axillary temperature  
 218 >37.5 degrees C and any parasitemia, after PCR-documented blood-stage infection (163 malaria events). Follow-up  
 219 time was limited to 60 days from initial blood-stage infection. Results are ordered by increasing P values. HR = hazard  
 220 ratio; LCI = lower 95% confidence interval; UCI = upper 95% confidence interval.

221  
 222 as a covariate in a reduced Cox regression model, group O blood type affected neither malaria  
 223 risk itself nor the association between CIDRy-specific IgG and risk of febrile malaria (Table S3).  
 224 Notably, baseline CIDRy3-specific IgG reactivity did not significantly correlate with decreased  
 225 parasite density at the first malaria episode after controlling for age and the presence of the HbS  
 226 allele (data not shown), suggesting that CIDRy-specific IgG may not have anti-parasite activity.  
 227 Given the association between CIDRy-specific IgG and delay in malaria fever during the first year  
 228 of the study, we specifically examined if CIDRy3 serostatus at the beginning of each malaria  
 229 season affected the risk of recurrent malaria episodes in the 60 children who were longitudinal  
 230 evaluated for PfEMP1 IgG responses over five malaria seasons. Presence of CIDRy3-specific IgG  
 231 prior to each season predicted a reduction in febrile malaria episodes even after controlling for  
 232 AMA1-specific IgG serostatus and the HbS allele (Table 2).

233 **Table 2. Relationship between CIDRy3 seropositivity and protection from recurrent malaria episodes.**

| Variable            | RR    | LCI   | UCI   | P value  |
|---------------------|-------|-------|-------|----------|
| CIDRy3 seropositive | 0.652 | 0.486 | 0.875 | 0.00433  |
| AMA1 seropositive   | 1.14  | 0.862 | 1.51  | 0.355    |
| HbS allele          | 0.437 | 0.309 | 0.619 | 2.99E-06 |

234 Results of the Andersen-Gill extension of the Cox regression model to assess the relationship between CIDRy3-  
 235 specific IgG seropositivity and the risk of recurrent febrile malaria episodes (defined as fever >37.5°C and any  
 236 parasitemia; 376 events) in 60 children who were followed longitudinally over five malaria transmission seasons  
 237 from 2011 through 2015. Presence of the HbS allele and AMA1 seropositivity, a surrogate for overall malaria  
 238 exposure, were included as covariates. CIDRy3-specific and AMA1-specific IgG seropositivity were treated as time-

239 dependent covariates that varied over each season. RR = relative risk; LCI = lower 95% confidence interval; UCI =  
240 upper 95% confidence interval.

241

242

## 243 **DISCUSSION**

244 PfEMP1 variants containing domains of the CIDR $\alpha$ 1 class generally bind to EPCR on  
245 endothelial cells and are associated with severe malaria<sup>10</sup>, whereas variants containing domains  
246 of the CIDR $\alpha$ 2-6 classes bind to CD36 present on several host cell types, including microvascular  
247 endothelial cells, mononuclear phagocytes, and platelets<sup>16,37</sup>. Antibodies targeting these PfEMP1  
248 domains can potentially disrupt adhesion of IEs to host receptors but can also facilitate IE  
249 clearance via opsonization and phagocytosis or antibody-mediated cytotoxicity<sup>10,38,39</sup>. Consistent  
250 with a prior study conducted in a Tanzanian cohort<sup>28</sup>, we observed early acquisition of IgG  
251 antibodies against EPCR-binding PfEMP1 variants of the CIDR $\alpha$ 1 domain class relative to CD36-  
252 binding variants in both age-stratified cross-sectional and longitudinal analyses. This is also  
253 consistent with studies that investigated acquisition of antibodies to PfEMP1 classified by  
254 upstream sequence group and found that antibodies to DBL and CIDR domains belonging to  
255 group A and B/A are acquired earlier in life than group B and C variants among individuals living  
256 in malaria-endemic settings<sup>26,40</sup>. Importantly, the antigen panel used in the current study  
257 contained unique CIDR domains not covered by these prior studies.

258 Among the 35 distinct CIDR domains evaluated here, CIDR $\alpha$ 1.7(c) elicited the most robust  
259 and prevalent IgG responses in early childhood, eventually approaching 100% seroprevalence in  
260 adolescents and adults in this cohort. Longitudinal analysis to assess hierarchical acquisition  
261 confirmed that IgG antibodies specific for CIDR $\alpha$ 1.7(c) were acquired first, with IgG against the  
262 related CIDR $\alpha$ 1.7(a) variant acquired fourth. Transcripts encoding CIDR $\alpha$ 1.7 domains have been

263 found to predominate among the most severe cases of pediatric cerebral malaria—those that  
264 lead to brain swelling and death<sup>19</sup>. The immunodominance of CIDR $\alpha$ 1.7(c) may be a consequence  
265 of epitopes targeted by cross-reactive CIDR $\alpha$ 1 antibodies<sup>41, 42</sup>. Moreover, PfEMP1 with CIDR $\alpha$ 1.4  
266 and CIDR $\alpha$ 1.7 domains frequently contain ICAM1-binding DBL $\beta$  domains<sup>43</sup>. The dual EPCR- and  
267 ICAM1-binding phenotype is thought to be particularly pathogenic, and antibodies to these DBL $\beta$   
268 domains have been associated with reduced risk of clinical malaria with parasite densities of  
269  $\geq 10,000$  parasites/ $\mu$ l<sup>44</sup>. We also observed early acquisition of IgG specific for CIDR $\alpha$ 1.8 domains.  
270 Expression of these domains, as well as EPCR-binding CIDR $\alpha$ 1 domains in general, is associated  
271 with severe malaria including cerebral malaria in African children<sup>18, 19, 20, 21, 45</sup> and Indian adults<sup>46</sup>.

272 Given that all CIDR $\alpha$ 1 variants have been linked to severe malaria in African children, the early  
273 acquisition of IgG specific to CIDR $\alpha$ 1.7 and CIDR $\alpha$ 1.8 domains may just be a reflection of local  
274 parasite population dynamics rather than enhanced pathogenicity conferred by these specific  
275 CIDR variants. However, the potential lethality of parasites expressing CIDR $\alpha$ 1 in general  
276 underscores why a vigorous host antibody response against these variant domains in early  
277 childhood may be advantageous. This study builds on older work<sup>4, 47, 48</sup> showing an age-specific  
278 acquisition of antibodies to particular parasite strains, and we are able to statistically confirm this  
279 pattern for the first time, and identify key genetic underpinnings of those observations. We still  
280 cannot address the slippery problem of whether this order reflects the circulation of genotypes  
281 with different transmissibility; under this scenario, high fitness genotypes lead to high prevalence  
282 and therefore low age of first infection, and coincidentally cause more disease in relatively non-  
283 immune children compared to low fitness genotypes as a result. In contrast, it is possible that the



284 ordered expression of PfEMP1 variants across strains, potentially in response to the immune  
285 status of the host the parasite is in, leads to the hierarchical acquisition of antibodies observed.

286 Due to the low incidence of severe disease in the cohort, we could not assess the impact of  
287 CIDR $\alpha$ 1.7-specific or CIDR $\alpha$ 1.8-specific antibodies on the risk of severe malaria in the study.  
288 However, when all 35 CIDRs were assessed for association with the prospective risk of  
289 uncomplicated, febrile malaria, IgG specific to CIDR $\gamma$ 3 (IT4var08) was significantly associated with  
290 reduced malaria risk. PfEMP1 variants encoding CIDR $\beta$ , CIDR $\gamma$ , or CIDR $\delta$  domains have been  
291 associated with rosetting<sup>11, 46</sup>, which can enhance microvasculature obstruction thereby  
292 increasing malaria severity. However, direct evidence that any of these CIDR domains have  
293 intrinsic rosetting properties is lacking<sup>49</sup>. Rather, their association with rosetting may be related  
294 to their tandem expression with an adjacent DBL $\alpha$ 1 at the N-terminal head<sup>50</sup>. Rosetting frequency  
295 has been correlated with severity of malaria with the highest levels in cerebral malaria<sup>35, 51, 52</sup> but  
296 is still commonly observed in uncomplicated malaria. Thus, the role of rosetting in severity of  
297 malarial disease remains unclear. Nevertheless, disruption of rosettes by targeting DBL1 $\alpha$  has  
298 been used as a vaccine strategy<sup>53</sup>, and antibodies to rosetting-associated group 2 DBL $\alpha$  domains  
299 predicted protection from uncomplicated malaria, suggesting a protective role for these  
300 antibodies in less severe disease<sup>30, 31</sup>. Although speculative, it is possible that naturally acquired  
301 CIDR $\gamma$ -specific IgG confers protection from febrile malaria by blocking rosette formation.  
302 However, this mechanism is not supported by the current study given that the protection  
303 attributable to CIDR $\gamma$ -specific IgG is unchanged after controlling for blood group O, which has  
304 been shown to be protective against severe falciparum malaria through the reduction of  
305 rosetting<sup>36</sup>. It also must be noted that reduced malaria risk was not observed for IgG-specific for

306 variants of the CIDR $\delta$  class, which is also predicted to have rosetting activity. Furthermore, as  
307 CIDR $\gamma$ 3 was the only CIDR $\gamma$  domain variant tested in this study, it remains unknown whether the  
308 protective effect observed here would be generalizable to IgG targeting other CIDR $\gamma$  variants.

309 A limitation of the study is that we did not sequence *var* transcripts from individuals with *P.*  
310 *falciparum* infections in the longitudinal analysis. This may have allowed us to prospectively  
311 assess if seroconversion against specific CIDRs such as CIDR $\alpha$ 1.7, CIDR $\alpha$ 1.8, or CIDR $\gamma$  reliably led  
312 to the absence of parasites expressing the corresponding *var* transcript during clinical malaria  
313 episodes. In addition to our limited assessment of CIDR $\gamma$  domains, we also did not evaluate CIDR $\beta$   
314 domains, which also have been associated with the rosetting phenotype.

315 In summary, this longitudinal study provides evidence that acquisition of IgG antibodies to  
316 PfEMP1 variants is ordered and demonstrates that antibodies to CIDR $\alpha$ 1 domains, specifically the  
317 pathogenic domain variants CIDR $\alpha$ 1.7 and CIDR $\alpha$ 1.8, are acquired the earliest in children residing  
318 in an area of intense, seasonal malaria transmission. We also show that IgG antibodies to the  
319 rosetting-associated CIDR $\gamma$ 3 domain is acquired early and is associated with protection from  
320 febrile malaria. Future studies will need to validate these findings in other transmission settings  
321 and determine the functional activity of these naturally acquired CIDR variant-specific antibodies.

322

## 323 **METHODS**

### 324 **Ethics**

325 The Ethics Committee of the Faculty of Medicine, Pharmacy and Dentistry at the University  
326 of Sciences, Techniques, and Technology of Bamako, and the Institutional Review Board of the  
327 National Institute of Allergy and Infectious Diseases, National Institutes of Health approved this

328 study (ClinicalTrials.gov identifier: NCT01322581). Written, informed consent was obtained from  
329 the parents or guardians of participating children or from adult participants.

### 330 **Study Site**

331 The study was conducted in the village of Kalifabougou, Mali, which is located 40 km  
332 northwest of Bamako, Mali within the savanna ecoclimatic zone. Within this community,  
333 Bambara is the predominant ethnic group, and ~90% of residents engage in subsistence farming.  
334 Malaria transmission is intense and seasonal, reliably occurring from June through December,  
335 with the vast majority of malaria cases caused by *P. falciparum*<sup>54</sup>.

### 336 **Study Population and Study Design**

337 Recruitment and enrollment procedures of participants for this study have been previously  
338 described<sup>55</sup>. Briefly, exclusion criteria at enrollment included a hemoglobin level <7 g/dL, axillary  
339 temperature  $\geq 37.5^{\circ}\text{C}$ , acute systemic illness, underlying chronic disease, use of antimalarial or  
340 immunosuppressive medications in the past 30 days, or pregnancy. The study design and  
341 selection of subjects are summarized in [Fig. S1](#).

### 342 **Human samples**

343 At the beginning and end of the malaria-transmission season, blood samples were drawn by  
344 venipuncture into sodium-citrate-containing Vacutainer tubes (Becton Dickinson). Plasma was  
345 separated by centrifugation and cryopreserved. Hemoglobin typing was performed using a D-10  
346 instrument (Bio-Rad). Blood for ABO typing was collected in EDTA containing microtainers. ABO  
347 typing was conducted with forward typing using Cypress Diagnostics Reagents. Anti-A, Anti-B,  
348 and Anti-AB IgM reagents were mixed with the sample, and blood type was determined by  
349 agglutination. During the first malaria season, blood was collected by finger-prick onto 903 filter

350 paper (Whatman) for PCR analysis at each scheduled clinic visit (occurring at 2-week intervals for  
351 7 months) and sick visit for subsequent molecular diagnostics.

## 352 **Diagnosis and Treatment of Infections**

353 **Clinical malaria episodes.** Individuals were initially enrolled in May 2011 and have been  
354 followed continuously since unless withdrawn or lost to follow-up. During the first malaria  
355 season, clinical malaria episodes were detected prospectively by self-referral and weekly active  
356 clinical surveillance visits which alternated between the study clinic and the participants' homes.  
357 Passive malaria surveillance and pre- and post-malaria season cross-sectional surveys have  
358 continued during subsequent years. All individuals with signs and symptoms of malaria and any  
359 level of *Plasmodium* parasitemia detected by light microscopy were treated according to the  
360 National Malaria Control Program guidelines in Mali. For the current study, a clinical malaria  
361 episode was defined as any parasitemia on contemporaneous blood smear, an axillary  
362 temperature of  $\geq 37.5^{\circ}\text{C}$  within 24 hours, and no other cause of fever discernible by physical  
363 exam.

364 **Blood smears.** Thick blood smears were stained with Giemsa and counted against 300  
365 leukocytes. Parasite densities were recorded as the number of asexual parasites/ $\mu\text{l}$  of blood  
366 based on a mean leukocyte count of 7500 cells/ $\mu\text{l}$ . Each smear was read in blinded manner by  
367 two certified microscopists of the laboratory team.

368 **Molecular detection.** For each participant, the first *P. falciparum* infection of the initial  
369 malaria season was detected retrospectively by PCR analysis of the longitudinally collected dried  
370 blood spots<sup>54</sup>. First malaria episodes were determined from the clinical visit data.

## 371 **Protein Expression and Multiplex Immunoassays**

372 The 35 recombinant His-tagged CIDR domains (Table S1) were expressed in baculovirus-  
373 transfected insect cells, and purified by nickel affinity chromatography as previously described<sup>28</sup>,  
374 <sup>42, 56</sup>. AMA1, CSP, and MSP1 recombinant proteins were kindly provided by David Narum  
375 (Laboratory of Malaria Immunology and Vaccinology, NIAID, NIH). AMA1 and CSP were expressed  
376 from *P. falciparum* 3D7 in *P. pastoris* as previously described<sup>57, 58</sup>. MSP1 was expressed from *P.*  
377 *falciparum* 3D7 in *Escherichia coli* as previously described<sup>59</sup>. Purified tetanus toxoid was provided  
378 the staff at Biologic Laboratories, University of Massachusetts Medical School. Bovine serum  
379 albumin (BSA) was obtained from Sigma. These proteins were coupled to MagPlex-C microspheres  
380 (Luminex) and mixed to form a protein bead array in which IgG reactivity to each antigen could  
381 be measured in multiplex, as previously described<sup>60</sup> with minor modifications. Briefly, plasma  
382 samples were diluted 1:500 and 1:2000 (to better assess highly reactive antigens) in Assay Buffer  
383 E (ABE: 0.1% BSA, 0.05% Tween-20 in PBS, pH7.4). For each plate, pooled malaria-hyperimmune  
384 plasma was serially diluted in ABE at 1:50, 1:158, 1:500, 1:1580, 1:5000, 1:1580, 1:50000, and  
385 1:158000 to generate an 8-point dilutional standard curve. 50 µl of beads and 50 µl of diluted  
386 plasma was added to 96-well microtiter plates (MSBVS 1210, Millipore, USA) pre-wetted with  
387 ABE. 50 µl of phycoerythrin-conjugated Goat Anti-Human IgG (Jackson ImmunoResearch  
388 Laboratories), diluted 1:3000 was added, and mean fluorescent intensities were measured using  
389 the Luminex 200 system. To account for plate-to-plate variation, fluorescence intensities were  
390 normalized using the median reactivity for each antigen on each plate. Normalized intensities  
391 were then scaled to the mean reactivity for each antigen to allow comparison between antigens.  
392 Using the ncal function within the nCal package<sup>61</sup>, IgG concentrations were interpolated from the  
393 standard curves generated from serial diluted pooled malaria-immune plasma and the resulting

394 concentrations reported as arbitrary units (AU), which was used for statistical analyses and  
395 visualization.

### 396 **Ordered Acquisition Analysis**

397 If seroconversion to CIDR domains occurs in a stereotypical order, then each individual's  
398 sequence of seroconversions in this longitudinal study should be congruent with that order. Of  
399 course, we do not know such an order *a priori*, so we find it by searching over all orderings to  
400 find the one that minimizes the number of order-violating seroconversions. This *minimum*  
401 *violations ranking* (MVR) consists of both the ordinal ranking itself and a corresponding number  
402 of rank violations  $v$ . These outputs can be visualized by plotting a heatmap, with indices ordered  
403 by the minimizing ranking as in Fig. 3A. Clear triangular structure indicates the strength of the  
404 ordering, and  $v$  is equal to the sum of the sparser triangle.

405 Note that the more that individuals' seroconversions occur strictly in their rank order, the  
406 smaller  $v$  will be. In this way, the number of violations  $v$  provides a convenient test statistic for a  
407 standard one-tailed p-value test: our null hypothesis is that there is no meaningful order to  
408 seroconversions, and thus, randomly permuting the order of seroconversions for each individual  
409 and recomputing  $v$  should make no difference. In other words, the null hypothesis is that the  
410 number of violations  $v$  in the real data is statistically indistinguishable from the number of  
411 violations in the time-randomized data  $v_{\text{random}}$ . The p-value can be computed then as  $p = \Pr(v <$   
412  $v_{\text{random}})$ . When actual seroconversions are significantly more orderable than random  
413 seroconversions (while preserving the seroconversion counts per individual and seroconversions  
414 per CIDR domain), it indicates the presence of a statistically significant stereotypical ordering, as  
415 in Fig. 3B.



416 Computations were performed according to the following details. Let matrix entry  $A_{ij}$  be the  
417 number of times, over each individual, that a seroconversion to  $i$  was observed prior to a  
418 seroconversion to  $j$ . If the matrix's rows and columns are sorted according to some re-ordering  $r$ ,  
419 then the number of violations  $v$  can be computed as the sum of the lower triangle of  $A(r)$ . Finding  
420 the  $r$  that minimizes  $v$  can be done by beginning from a random  $r$ , and then sequentially proposing  
421 swaps of pairs of indices in which any swap that increases  $v$  is rejected and otherwise swaps are  
422 accepted. This MVR algorithm exits after a large number of proposed swaps have been rejected  
423 without any decrease in  $v$ , and the output is both  $v$  and the order of seroconversion that  
424 corresponds to that  $v$ . Permutation tests were then performed by shuffling the seroconversions  
425 and years, independently for each individual, and then applying the computation above.

## 426 **Statistical Analysis**

427 The use of specific statistical tests and methods are indicated in the Results and/or Fig.  
428 legends. Statistical significance was defined as a 2-tailed P value of  $<.05$ . Analyses were  
429 performed in R version 3.6.1 (<http://www.R-project.org>). Plots were generated with the *ggplot2*  
430 package. Cox regression was performed using the *survival* and *glmnet* packages. For the time to  
431 febrile malaria analysis (Table 1), variable selection from among the 35 CIDR seropositivity  
432 variables, age, gender, AMA1 seroreactivity, and the presence of the HbS allele was determined  
433 using regularized Cox regression fit with the least absolute shrinkage and selection operator  
434 (LASSO) penalty using 10-fold cross validation with 1000 iterations<sup>62</sup>. The follow-up period after  
435 initial blood-stage infection was 60 days. For the final Cox regression model, age, gender, and the  
436 presence of the HbS allele were included as co-variates along with the LASSO-selected CIDR  
437 variables. For the recurrent event analysis, the Andersen-Gill extension of the Cox regression

438 model was used to determine the relative risk of malaria over five malaria seasons using presence  
439 of the HbS allele as a covariate and AMA1-specific IgG seropositivity (a surrogate for overall  
440 malaria exposure) and CIDRγ3-specific IgG seropositivity as time-dependent covariates that  
441 varied over each season.  
442

443 **Acknowledgments**

444 We thank all the participants in the Kalifabougou cohort and the field team for making this study  
445 possible. We also thank David Narum (Laboratory of Malaria Immunology and Vaccinology,  
446 NIAID, NIH) for providing the recombinant AMA1, CSP, and MSP1 proteins and Chiung-Yu Huang  
447 (University of California, San Francisco) for her critical review and suggestions regarding the  
448 survival and recurrent event analysis. The staff at Biologic Laboratories, University of  
449 Massachusetts Medical School at Jamaica Plains, MA generously provided the purified tetanus  
450 toxoid.

451 **Funding**

452 This project was supported with federal funds from the Division of Intramural Research, National  
453 Institute of Allergy and Infectious Diseases (NIAID), National Institutes of Health, Department of  
454 Health and Human Services. T.M.T. was also supported by K08AI125682 (NIAID) and the Doris  
455 Duke Charitable Foundation Clinical Scientist Development Award.

456

457 **Author Contributions**

458 NO, LHM, SKP, LT, TL, PDC, and TMT conceived the study. AO, SD, KK, and BT were responsible  
459 for the cohort study and collection of samples. NO, LT, SL, and TBY conducted the experiments.  
460 NO, DBL, and TMT analyzed the data. TMT, TL, CB, DBL, and PDC wrote the manuscript with  
461 contributions from NO, LT, LHM, and SKP. All authors read and approved the manuscript.

462 **References**

463

464 1. World Health Organization. *World Malaria Report 2019*. World Health Organization  
465 (2019).

466

467 2. Jensen AR, Adams Y, Hviid L. Cerebral Plasmodium falciparum malaria: The role of PfEMP1  
468 in its pathogenesis and immunity, and PfEMP1-based vaccines to prevent it. *Immunol Rev*,  
469 (2019).

470

471 3. Baruch DI, *et al.* Cloning the P. falciparum gene encoding PfEMP1, a malarial variant  
472 antigen and adherence receptor on the surface of parasitized human erythrocytes. *Cell*  
473 **82**, 77-87 (1995).

474

475 4. Bull PC, Lowe BS, Kortok M, Molyneux CS, Newbold CI, Marsh K. Parasite antigens on the  
476 infected red cell surface are targets for naturally acquired immunity to malaria. *Nat Med*  
477 **4**, 358-360 (1998).

478

479 5. Chan JA, *et al.* Targets of antibodies against Plasmodium falciparum-infected erythrocytes  
480 in malaria immunity. *J Clin Invest* **122**, 3227-3238 (2012).

481

482 6. Su XZ, *et al.* The large diverse gene family var encodes proteins involved in cytoadherence  
483 and antigenic variation of Plasmodium falciparum-infected erythrocytes. *Cell* **82**, 89-100  
484 (1995).

485

486 7. Gardner MJ, *et al.* Genome sequence of the human malaria parasite Plasmodium  
487 falciparum. *Nature* **419**, 498-511 (2002).

488

489 8. Chen Q, *et al.* Developmental selection of var gene expression in Plasmodium falciparum.  
490 *Nature* **394**, 392-395 (1998).

491

492 9. Smith JD, *et al.* Switches in expression of Plasmodium falciparum var genes correlate with  
493 changes in antigenic and cytoadherent phenotypes of infected erythrocytes. *Cell* **82**, 101-  
494 110 (1995).

495

496 10. Turner L, *et al.* Severe malaria is associated with parasite binding to endothelial protein C  
497 receptor. *Nature* **498**, 502-505 (2013).

498

499 11. Smith JD, Rowe JA, Higgins MK, Lavstsen T. Malaria's deadly grip: cytoadhesion of  
500 Plasmodium falciparum-infected erythrocytes. *Cell Microbiol* **15**, 1976-1983 (2013).

501

502 12. Rask TS, Hansen DA, Theander TG, Gorm Pedersen A, Lavstsen T. Plasmodium falciparum  
503 erythrocyte membrane protein 1 diversity in seven genomes--divide and conquer. *PLoS*  
504 *Comput Biol* **6**, (2010).

505

- 506 13. Otto T, *et al.* Evolutionary analysis of the most polymorphic gene family in falciparum  
507 malaria [version 1; peer review: 1 approved, 1 approved with reservations]. *Wellcome*  
508 *Open Research* **4**, (2019).  
509
- 510 14. Fried M, Duffy PE. Adherence of Plasmodium falciparum to chondroitin sulfate A in the  
511 human placenta. *Science* **272**, 1502-1504 (1996).  
512
- 513 15. Buffet PA, *et al.* Plasmodium falciparum domain mediating adhesion to chondroitin  
514 sulfate A: a receptor for human placental infection. *Proc Natl Acad Sci U S A* **96**, 12743-  
515 12748 (1999).  
516
- 517 16. Robinson BA, Welch TL, Smith JD. Widespread functional specialization of Plasmodium  
518 falciparum erythrocyte membrane protein 1 family members to bind CD36 analysed  
519 across a parasite genome. *Mol Microbiol* **47**, 1265-1278 (2003).  
520
- 521 17. Lavstsen T, Salanti A, Jensen AT, Arnot DE, Theander TG. Sub-grouping of Plasmodium  
522 falciparum 3D7 var genes based on sequence analysis of coding and non-coding regions.  
523 *Malar J* **2**, 27 (2003).  
524
- 525 18. Jespersen JS, *et al.* Plasmodium falciparum var genes expressed in children with severe  
526 malaria encode CIDRalpha1 domains. *EMBO Mol Med* **8**, 839-850 (2016).  
527
- 528 19. Kessler A, *et al.* Linking EPCR-Binding PfEMP1 to Brain Swelling in Pediatric Cerebral  
529 Malaria. *Cell host & microbe* **22**, 601-614 e605 (2017).  
530
- 531 20. Mkumbaye SI, *et al.* The Severity of Plasmodium falciparum Infection Is Associated with  
532 Transcript Levels of var Genes Encoding Endothelial Protein C Receptor-Binding P.  
533 falciparum Erythrocyte Membrane Protein 1. *Infect Immun* **85**, (2017).  
534
- 535 21. Shabani E, Hanisch B, Opoka RO, Lavstsen T, John CC. Plasmodium falciparum EPCR-  
536 binding PfEMP1 expression increases with malaria disease severity and is elevated in  
537 retinopathy negative cerebral malaria. *BMC Med* **15**, 183 (2017).  
538
- 539 22. Cabrera A, Neculai D, Kain KC. CD36 and malaria: friends or foes? A decade of data  
540 provides some answers. *Trends Parasitol* **30**, 436-444 (2014).  
541
- 542 23. Ochola LB, *et al.* Specific receptor usage in Plasmodium falciparum cytoadherence is  
543 associated with disease outcome. *PLoS One* **6**, e14741 (2011).  
544
- 545 24. Gupta S, Snow RW, Donnelly CA, Marsh K, Newbold C. Immunity to non-cerebral severe  
546 malaria is acquired after one or two infections. *Nat Med* **5**, 340-343 (1999).  
547
- 548 25. Wahlgren M, Goel S, Akhouri RR. Variant surface antigens of Plasmodium falciparum and  
549 their roles in severe malaria. *Nat Rev Microbiol* **15**, 479-491 (2017).

- 550  
551 26. Cham GK, *et al.* Hierarchical, domain type-specific acquisition of antibodies to  
552 Plasmodium falciparum erythrocyte membrane protein 1 in Tanzanian children. *Infect*  
553 *Immun* **78**, 4653-4659 (2010).  
554  
555 27. Duffy MF, *et al.* Differences in PfEMP1s recognized by antibodies from patients with  
556 uncomplicated or severe malaria. *Malaria journal* **15**, 258 (2016).  
557  
558 28. Turner L, *et al.* IgG antibodies to endothelial protein C receptor-binding cysteine-rich  
559 interdomain region domains of Plasmodium falciparum erythrocyte membrane protein 1  
560 are acquired early in life in individuals exposed to malaria. *Infect Immun* **83**, 3096-3103  
561 (2015).  
562  
563 29. Rambhatla JS, *et al.* Acquisition of Antibodies Against Endothelial Protein C Receptor-  
564 Binding Domains of Plasmodium falciparum Erythrocyte Membrane Protein 1 in Children  
565 with Severe Malaria. *J Infect Dis* **219**, 808-818 (2019).  
566  
567 30. Tessema SK, *et al.* Protective Immunity against Severe Malaria in Children Is Associated  
568 with a Limited Repertoire of Antibodies to Conserved PfEMP1 Variants. *Cell Host Microbe*  
569 **26**, 579-590 e575 (2019).  
570  
571 31. Bull PC, *et al.* Plasmodium falciparum variant surface antigen expression patterns during  
572 malaria. *PLoS Pathog* **1**, e26 (2005).  
573  
574 32. Tran TM, *et al.* Naturally acquired antibodies specific for Plasmodium falciparum  
575 reticulocyte-binding protein homologue 5 inhibit parasite growth and predict protection  
576 from malaria. *J Infect Dis* **209**, 789-798 (2014).  
577  
578 33. Bustamante LY, *et al.* Synergistic malaria vaccine combinations identified by systematic  
579 antigen screening. *Proc Natl Acad Sci U S A* **114**, 12045-12050 (2017).  
580  
581 34. Weiss GE, *et al.* The Plasmodium falciparum-specific human memory B cell compartment  
582 expands gradually with repeated malaria infections. *PLoS Pathog* **6**, e1000912 (2010).  
583  
584 35. Doumbo OK, *et al.* High levels of Plasmodium falciparum rosetting in all clinical forms of  
585 severe malaria in African children. *Am J Trop Med Hyg* **81**, 987-993 (2009).  
586  
587 36. Rowe JA, *et al.* Blood group O protects against severe Plasmodium falciparum malaria  
588 through the mechanism of reduced rosetting. *Proc Natl Acad Sci U S A* **104**, 17471-17476  
589 (2007).  
590  
591 37. Silverstein RL, Febbraio M. CD36, a scavenger receptor involved in immunity, metabolism,  
592 angiogenesis, and behavior. *Sci Signal* **2**, re3 (2009).  
593



- 594 38. Chan JA, *et al.* Patterns of protective associations differ for antibodies to *P. falciparum*-  
595 infected erythrocytes and merozoites in immunity against malaria in children. *Eur J*  
596 *Immunol* **47**, 2124-2136 (2017).  
597
- 598 39. Arora G, *et al.* NK cells inhibit *Plasmodium falciparum* growth in red blood cells via  
599 antibody-dependent cellular cytotoxicity. *eLife* **7**, (2018).  
600
- 601 40. Cham GK, *et al.* Sequential, ordered acquisition of antibodies to *Plasmodium falciparum*  
602 erythrocyte membrane protein 1 domains. *J Immunol* **183**, 3356-3363 (2009).  
603
- 604 41. Turner L, Theander TG, Lavstsen T. Immunization with Recombinant *Plasmodium*  
605 *falciparum* Erythrocyte Membrane Protein 1 CIDRalpha1 Domains Induces Domain  
606 Subtype Inhibitory Antibodies. *Infect Immun* **86**, (2018).  
607
- 608 42. Lau CK, *et al.* Structural conservation despite huge sequence diversity allows EPCR binding  
609 by the PfEMP1 family implicated in severe childhood malaria. *Cell Host Microbe* **17**, 118-  
610 129 (2015).  
611
- 612 43. Lennartz F, *et al.* Structure-Guided Identification of a Family of Dual Receptor-Binding  
613 PfEMP1 that Is Associated with Cerebral Malaria. *Cell Host Microbe* **21**, 403-414 (2017).  
614
- 615 44. Tessema SK, *et al.* Antibodies to Intercellular Adhesion Molecule 1-Binding *Plasmodium*  
616 *falciparum* Erythrocyte Membrane Protein 1-DBLbeta Are Biomarkers of Protective  
617 Immunity to Malaria in a Cohort of Young Children from Papua New Guinea. *Infect Immun*  
618 **86**, (2018).  
619
- 620 45. Storm J, *et al.* Cerebral malaria is associated with differential cytoadherence to brain  
621 endothelial cells. *EMBO Mol Med* **11**, (2019).  
622
- 623 46. Bernabeu M, *et al.* Severe adult malaria is associated with specific PfEMP1 adhesion types  
624 and high parasite biomass. *Proceedings of the National Academy of Sciences of the United*  
625 *States of America* **113**, E3270-3279 (2016).  
626
- 627 47. Gupta S, Day KP. A theoretical framework for the immunoepidemiology of *Plasmodium*  
628 *falciparum* malaria. *Parasite Immunol* **16**, 361-370 (1994).  
629
- 630 48. Bull PC, Lowe BS, Kortok M, Marsh K. Antibody recognition of *Plasmodium falciparum*  
631 erythrocyte surface antigens in Kenya: evidence for rare and prevalent variants. *Infect*  
632 *Immun* **67**, 733-739 (1999).  
633
- 634 49. Rowe JA, Moulds JM, Newbold CI, Miller LH. *P. falciparum* rosetting mediated by a  
635 parasite-variant erythrocyte membrane protein and complement-receptor 1. *Nature* **388**,  
636 292-295 (1997).  
637

- 638 50. Ghumra A, *et al.* Induction of strain-transcending antibodies against Group A PfEMP1  
639 surface antigens from virulent malaria parasites. *PLoS Pathog* **8**, e1002665 (2012).  
640
- 641 51. Carlson J, Helmby H, Hill AV, Brewster D, Greenwood BM, Wahlgren M. Human cerebral  
642 malaria: association with erythrocyte rosetting and lack of anti-rosetting antibodies.  
643 *Lancet* **336**, 1457-1460 (1990).  
644
- 645 52. Ho M, Davis TM, Silamut K, Bunnag D, White NJ. Rosette formation of Plasmodium  
646 falciparum-infected erythrocytes from patients with acute malaria. *Infect Immun* **59**,  
647 2135-2139 (1991).  
648
- 649 53. Chen Q, *et al.* Immunization with PfEMP1-DBL1alpha generates antibodies that disrupt  
650 rosettes and protect against the sequestration of Plasmodium falciparum-infected  
651 erythrocytes. *Vaccine* **22**, 2701-2712 (2004).  
652
- 653 54. Tran TM, *et al.* An intensive longitudinal cohort study of Malian children and adults reveals  
654 no evidence of acquired immunity to Plasmodium falciparum infection. *Clinical infectious*  
655 *diseases : an official publication of the Infectious Diseases Society of America* **57**, 40-47  
656 (2013).  
657
- 658 55. Doumbo S, *et al.* Co-infection of long-term carriers of Plasmodium falciparum with  
659 Schistosoma haematobium enhances protection from febrile malaria: a prospective  
660 cohort study in Mali. *PLoS Negl Trop Dis* **8**, e3154 (2014).  
661
- 662 56. Hsieh FL, Turner L, Bolla JR, Robinson CV, Lavstsen T, Higgins MK. The structural basis for  
663 CD36 binding by the malaria parasite. *Nature communications* **7**, 12837 (2016).  
664
- 665 57. Plassmeyer ML, *et al.* Structure of the Plasmodium falciparum circumsporozoite protein,  
666 a leading malaria vaccine candidate. *J Biol Chem* **284**, 26951-26963 (2009).  
667
- 668 58. Ellis RD, *et al.* Phase 1 study in malaria naive adults of BSAM2/Alhydrogel(R)+CPG 7909, a  
669 blood stage vaccine against P. falciparum malaria. *PLoS One* **7**, e46094 (2012).  
670
- 671 59. Shimp RL, Jr., *et al.* Production and characterization of clinical grade Escherichia coli  
672 derived Plasmodium falciparum 42 kDa merozoite surface protein 1 (MSP1(42)) in the  
673 absence of an affinity tag. *Protein Expr Purif* **50**, 58-67 (2006).  
674
- 675 60. Cham GK, Kurtis J, Lusingu J, Theander TG, Jensen AT, Turner L. A semi-automated  
676 multiplex high-throughput assay for measuring IgG antibodies against Plasmodium  
677 falciparum erythrocyte membrane protein 1 (PfEMP1) domains in small volumes of  
678 plasma. *Malar J* **7**, 108 (2008).  
679
- 680 61. Fong Y, Sebestyen K, Yu X, Gilbert P, Self S. nCal: an R package for non-linear calibration.  
681 *Bioinformatics* **29**, 2653-2654 (2013).

682  
683  
684  
685  
686

62. Simon N, Friedman J, Hastie T, Tibshirani R. A Sparse-Group Lasso. *Journal of Computational and Graphical Statistics* **22**, 231-245 (2013).
