1 **Title:**

2

3 Longitudinal analysis of naturally acquired antibodies to PfEMP1 CIDR domain variants and their  
4 association with malaria protection

5

6 **Authors:**

7

8 Nyamekye Obeng-Adjei<sup>1,2\*</sup>, Daniel B. Larremore<sup>3,4\*</sup>, Louise Turner<sup>5</sup>, Aissata Ongoiba<sup>6</sup>, Shanping  
9 Li<sup>1</sup>, Safiatou Doumbo<sup>6</sup>, Takele B. Yazew<sup>7</sup>, Kassoum Kayentao<sup>6</sup>, Louis H. Miller<sup>8</sup>, Boubacar Traore<sup>6</sup>,  
10 Susan K. Pierce<sup>7</sup>, Caroline O. Buckee<sup>9</sup>, Thomas Lavstsen<sup>5</sup>, Peter D. Crompton<sup>1</sup>, Tuan M. Tran<sup>1,10,11</sup>

11

12 \*Both authors contributed equally.

13

14 Corresponding author:

15 Tuan M. Tran ([tuantran@iu.edu](mailto:tuantran@iu.edu))

16

17 **Affiliations:**

18

19 1. Malaria Infection Biology and Immunity Section, Laboratory of Immunogenetics,  
20 National Institute of Allergy and Infectious Diseases, National Institutes of Health,  
Rockville, Maryland, USA

21 2. Innate Immunity Research Unit, GlaxoSmithKline, Collegeville, Pennsylvania, USA

22 3. Department of Computer Science, University of Colorado Boulder, Boulder, Colorado,  
23 USA

24 4. BioFrontiers Institute, University of Colorado Boulder, Boulder, Colorado, 80303, USA

25 5. Centre for Medical Parasitology, Department of Immunology & Microbiology, University  
26 of Copenhagen and Department of Infectious Diseases, Rigshospitalet, 1017

27 Copenhagen, Denmark

28 6. Mali International Center of Excellence in Research, University of Sciences, Technique  
29 and Technology of Bamako, Bamako, Mali

30 7. Laboratory of Immunogenetics, National Institute of Allergy and Infectious Diseases,  
31 National Institutes of Health, Rockville, Maryland, USA

32 8. Laboratory of Malaria and Vector Research, National Institute of Allergy and Infectious  
33 Diseases, National Institutes of Health, Rockville, Maryland, USA

34 9. Center for Communicable Disease Dynamics, Department of Epidemiology, Harvard T. H.  
35 Chan School of Public Health, Boston, Massachusetts, USA

36 10. Division of Infectious Diseases, Department of Medicine, Indiana University School of  
37 Medicine, Indianapolis, Indiana, USA

38 11. Ryan White Center for Pediatric Infectious Disease and Global Health, Department of  
39 Pediatrics, Indiana University School of Medicine, Indianapolis, Indiana, USA

40 **ABSTRACT**

41 Malaria pathogenicity is determined, in part, by the adherence of *Plasmodium falciparum*  
42 infected erythrocytes to the microvasculature mediated via specific interactions between  
43 PfEMP1 variant domains to host endothelial receptors. Naturally acquired antibodies against  
44 specific PfEMP1 variants can play an important role in clinical protection against malaria. We  
45 evaluated IgG responses against a repertoire of PfEMP1 CIDR domain variants to determine the  
46 rate and order of variant-specific antibody acquisition and their association with protection  
47 against febrile malaria in a prospective cohort study conducted in an area of intense, seasonal  
48 malaria transmission. Using longitudinal data, we found that IgG to the pathogenic domain  
49 variants CIDR $\alpha$ 1.7 and CIDR $\alpha$ 1.8 were acquired the earliest. Furthermore, IgG to CIDR $\gamma$ 3 was  
50 associated with reduced prospective risk of febrile malaria and recurrent malaria episodes.  
51 Future studies will need to validate these findings in other transmission settings and determine  
52 the functional activity of these naturally acquired CIDR variant-specific antibodies.

## 53 INTRODUCTION

54 Malaria due to *Plasmodium falciparum* causes greater than 400,000 deaths per annum (1).  
55 Severe clinical manifestations of *P. falciparum* malaria are precipitated by widespread  
56 sequestration of infected erythrocytes (IEs) in host microvasculature including in the brain and  
57 placenta which can lead to cerebral malaria and placental malaria, respectively (2).  
58 Cytoadherence of IEs occurs via specific interactions between host endothelial receptors and *P.*  
59 *falciparum* erythrocyte membrane protein (PfEMP1), a parasite-derived protein expressed on the  
60 surface of IEs that is a major target of naturally acquired immunity to malaria (3-5). The PfEMP1  
61 adhesins are encoded by ~60 *var* gene variants that differ within and between parasite genomes  
62 and that are expressed in a mutually exclusive manner within each IE (6-8). Switching between  
63 *var* genes aids in parasite immune evasion and functional diversification of the PfEMP1 family  
64 have resulted in mutually exclusive receptor binding phenotypes correlated to differences in  
65 clinical severity (9, 10).

66 Members of the PfEMP1 family vary in the size and number of extracellular Duffy-binding-  
67 like (DBL) and cysteine-rich interdomain region (CIDR) domains(11). DBL and CIDR domains are  
68 classified based on sequence similarity into six ( $\alpha$ ,  $\beta$ ,  $\gamma$ ,  $\delta$ ,  $\epsilon$ ,  $\xi$ ) and four ( $\alpha$ ,  $\beta$ ,  $\gamma$ ,  $\delta$ ) main classes,  
69 respectively, of which some can be further divided into sub-classes (e.g. CIDR $\alpha$ 1.1) (12, 13).  
70 PfEMP1 generally have a semi-conserved head structure near the N-terminus consisting of a  
71 tandem DBL $\alpha$ -CIDR domain. This can be followed by a second DBL $\delta$ -CIDR tandem domain or  
72 additional other types of DBL domains in larger proteins. Notably, however, the VAR2CSA PfEMP1  
73 variants do not contain typical CIDR domains and bind placental chondroitin sulfate A via  
74 specialized DBL domains (14, 15). PfEMP1 have diversified to either bind endothelial protein C

75 receptor (EPCR) (10), the scavenger receptor CD36 (16) or yet undermined receptors via their  
76 head structure CIDR domains. These phenotypes are maintained by the chromosomal  
77 organization of the *var* genes (17). Among the subtelomeric *var* genes, Group A genes transcribed  
78 toward the telomere encode DBL $\alpha$ 1-CIDR $\alpha$ 1 head structures binding to EPCR or DBL $\alpha$ 1-  
79 CIDR $\beta/\gamma/\delta$  head structures with unknown endothelial receptor specificities. Subtelomeric Group  
80 B *var* genes transcribed toward the centromere as well as centromeric Group C *var* genes encode  
81 DBL $\alpha$ 0-CIDR $\alpha$ 2-6 head-structures binding to CD36. In addition to this, chimeric group B/A *var*  
82 genes encode EPCR-binding DBL $\alpha$ 0-CIDR $\alpha$ 1 head structures. The EPCR-binding phenotype has  
83 been implicated in severe malaria (18-21), whereas CD36 binding has been associated with  
84 uncomplicated malaria (22, 23). Severe malaria has been associated with rosetting, a  
85 phenomenon which involves binding between an IE and several uninfected erythrocytes but with  
86 unclear clinical significance. A set of group A PfEMP1 with DBL $\alpha$ 1-CIDR $\beta/\gamma/\delta$  domains have been  
87 shown to mediate rosettes.

88 Immunity to severe malaria is generally acquired after only one to two severe episodes (24)  
89 with naturally acquired antibodies specific for PfEMP1 variants likely playing an important role in  
90 clinical protection (25). Antibodies to group A PfEMP1 variants tend to be acquired prior to  
91 antibodies to group B and C variants (26) and are associated with protection from severe malaria  
92 (27). Similarly, antibodies to EPCR-binding CIDR $\alpha$ 1 domains are acquired more rapidly than  
93 antibodies to other CIDR domains in areas of high malaria transmission intensity and are boosted  
94 by severe malaria but not uncomplicated malaria (28, 29). However, a recent study showed that  
95 antibodies to both rosetting-associated DBL $\alpha$  variants and CD36-binding CIDR domains predicted  
96 reduced risk of severe malaria to a similar extent as antibodies to EPCR-binding CIDR domains

97 (30). The same study also showed that antibodies to group 2 DBL $\alpha$  variants, which are associated  
98 with rosetting (31), also predicted protection from uncomplicated malaria.

99 To gain further insight into the role of PfEMP1-variant specific antibodies, we assessed IgG  
100 responses against a repertoire of PfEMP1 CIDR domains to determine the rate and order of  
101 variant-specific antibody acquisition and their association with protection against uncomplicated  
102 febrile malaria in a prospective cohort study conducted in a Malian village with intense and  
103 seasonal malaria transmission.

## 104 RESULTS

### 105 IgG specific for CIDR $\alpha$ 1, CIDR $\delta$ , and CIDR $\gamma$ domain variants are acquired rapidly.

106 Naturally acquired IgG antibody responses to 35 PfEMP1 CIDR domain variants representing  
107 subtypes  $\alpha$ ,  $\gamma$  and  $\delta$  CIDR, as well as three well-studied *P. falciparum* antigens (circumsporozoite  
108 protein [PfCSP], apical membrane protein 1 [PfAMA1], and merozoite surface protein 1  
109 [PfMSP1]), tetanus toxoid (non-malaria positive control), and bovine serum albumin (non-specific  
110 background control; [Table S1](#)) were determined by multiplex bead-based immunoassay in 680  
111 children and adults from the Kalifabougou, Mali cohort at their healthy baseline in May 2011 ([Fig.](#)  
112 [S1](#)). Hierarchical clustering of baseline PfEMP1-specific IgG reactivity revealed distinct clustering  
113 of samples by age, and by the presence of PCR-documented, asymptomatic *P. falciparum*  
114 infection; as well as clustering of antigen targets by group (A, B, or B/A), binding phenotype  
115 (EPCR, CD36, or unknown), and CIDR domain class ([Fig. 1a](#)); suggesting differential rates of  
116 acquisition of IgG between PfEMP1 variants with cumulative *P. falciparum* exposure and the  
117 acquisition of clinical immunity to malaria. PfEMP1-specific IgG reactivity increased rapidly up to

118 8 years of age, and within each age stratum, *P. falciparum* PCR-positive individuals exhibited  
119 greater variant-specific IgG reactivity than uninfected individuals (Fig. 1b).

120 Categorization of PfEMP-1 variants by CIDR domain class suggested that IgG specific for  
121 variants in the CIDR $\gamma$ , CIDR $\alpha$ 1, and CIDR $\delta$  classes was acquired rapidly whereas IgG specific for  
122 group B variants of the CIDR $\alpha$ 2-6 class was acquired slowly irrespective of *P. falciparum* infection  
123 status (Fig. 1c). Indeed, when compared to variants of other domain classes within the linear  
124 range of the fit curves (<8 years of age), IgG specific for variants within each of the CIDR $\gamma$ , CIDR $\alpha$ 1,  
125 and CIDR $\delta$  classes increased significantly more rapidly with age, whereas IgG specific for variants  
126 of the CIDR $\alpha$ 2-6 classes increased significantly more slowly with age, independent of *P.*  
127 *falciparum* infection status (Fig. 1d and Table S2). Of note, IgG specific for AMA1, CSP, and MSP1  
128 increased predictably with age in early childhood and plateaued in adolescence or young  
129 adulthood, which is similar to what we previously observed in this cohort (32, 33) (Fig. 1b-c). As  
130 we observed previously by ELISA in a separate cohort in Mali (34), increases in tetanus toxoid-  
131 specific IgG in early childhood and adolescence corresponded with the primary childhood vaccine  
132 series (diphtheria, tetanus, pertussis) and a subsequent booster of a tetanus toxoid-containing  
133 vaccine in females of child-bearing age (Fig. 1b-c).

134 With the exclusion of children <6 months of age whose IgG is most likely maternally derived,  
135 ranking of antigens by decreasing seropositivity within each age group revealed  
136 immunodominance of CIDR $\alpha$ 1, CIDR $\delta$ , and CIDR $\gamma$  domain classes, which are all either of the A or  
137 B/A *var* group, in early childhood (<7 years) that is maintained to a large degree in adolescence  
138 and early adulthood (Fig. S2). Notably, the most prevalent PfEMP1-specific IgG reactivity among  
139 individuals greater than 1 year of age was against CIDR $\alpha$ 1.7(c) with seroprevalence rapidly rising

140 from 25% in 2 to 3-year-old children to 60% in 4 to 6-year-old children and surpassing 95% in  
141 older children and adults (Fig. S2). However, the majority of individuals within the oldest age  
142 group (15-25 years) were also seropositive for several variants within the CIDR $\alpha$ 2-6 domain  
143 classes, suggesting that IgG antibodies against these variants are eventually acquired with  
144 additional years of malaria exposure.

145 To assess the longitudinal acquisition of variant-specific IgG, we determined variant-specific  
146 IgG reactivity across five annual cross-sectional surveys conducted just prior to each malaria  
147 transmission season for an age-stratified random sample of 60 children from the entire cohort  
148 (Fig. S1). Children in this subset experienced a median of 6 febrile malaria episodes (interquartile  
149 range, 4–9 episodes) with a broad range of parasite densities and distributed widely but with  
150 clear seasonal peaks in the number of episodes during the five-year surveillance period (Fig. 2a-  
151 b). In the youngest children (6 months to 2 years), IgG specific for variants of the CIDR $\alpha$ 1 and  
152 CIDR $\delta$  domain classes began low and then increased rapidly over four malaria seasons, whereas  
153 IgG specific for CIDR $\gamma$  initially decreased during the first two years before rising during the third  
154 year of surveillance (Fig. 2c). In contrast, older children (3 to 8 years) appeared to maintain stable  
155 levels of IgG specific for all PfEMP1 variants over four malaria seasons (Fig. 2c).

156 **Acquisition of IgG antibodies to CIDR domain classes is highly ordered with IgG against EPCR-**  
157 **binding domain variants CIDR $\alpha$ 1.7 and CIDR $\alpha$ 1.8 acquired first.**

158 We next asked whether IgG antibodies to individual PfEMP1 variants were acquired in a particular  
159 order. Here we used an approach called *minimum violations ranking* (MVR), where an algorithm  
160 searches over different possible orders of acquisition of antibodies to PfEMP1 variants such that,  
161 if a particular an order is assumed for each child, the number of order violations observed in the

162 data overall is minimized (refer to methods). We observed significantly less violations if we  
163 assumed an ordered acquisition of antibodies compared to a model with randomized  
164 seroconversion orders for each child, which highly suggests a hierarchical exposure to different  
165 parasite CIDR domains in this population (Fig. 3a-d). At the variant level, IgG specific to  
166 CIDR $\alpha$ 1.7(c) was acquired first followed by IgG to CIDR $\alpha$ 1.8b(a), CIDR $\alpha$ 1.8b(c), CIDR $\alpha$ 1.7(a),  
167 CIDR $\alpha$ 6, and CIDR $\gamma$ 3 (Fig. 3a). Grouped by CIDR domain class, IgG was acquired against CIDR $\gamma$  first  
168 followed by CIDR $\alpha$ 1, CIDR $\delta$ , and CIDR $\alpha$ 2-6 (Fig. 3b). Grouped on the basis of upstream sequence,  
169 IgG was acquired against B/A first followed by A and B (Fig. 3c). Lastly, when variants were  
170 grouped by binding phenotype, IgG against EPCR-binding domains were acquired first followed  
171 by domains with unknown binding phenotypes and CD36-binding domains (Fig. 3d). Whether  
172 this reflects differential prevalence of variants in the parasite population or age-specific  
173 expression patterns remains an open question.

#### 174 **CIDR $\gamma$ -specific IgG associates with protection from uncomplicated, febrile malaria.**

175 We focused on the risk of uncomplicated malaria given that severe malaria was rarely observed  
176 in the Kalifabougou cohort due to early diagnosis and treatment. We specifically evaluated  
177 whether baseline seropositivity for each variant could predict protection from febrile malaria  
178 after subsequent PCR-confirmed *P. falciparum* parasitemia in individuals who began the study  
179 PCR-negative using a Cox regression model that included age, presence of the malaria-protective  
180 HbS allele, gender, IgG reactivity to AMA1 (as a surrogate for prior malaria exposure), and  
181 seropositivity to each of the 35 PfEMP-1 variants as covariates. Notably, seropositivity to CIDR $\gamma$ 3  
182 (IT4var08), which has an unknown binding phenotype was significantly associated with reduced  
183 risk of febrile malaria (Table 1). CIDR $\gamma$  domains have been associated with rosetting of



184 erythrocytes (11), a phenomenon associated with severe forms of malaria (35) except in  
185 individuals with blood group O erythrocytes which appear to exhibit reduced rosetting (36). We  
186 therefore hypothesized that the reduced risk afforded by CIDR $\gamma$ -specific IgG might occur via the  
187 inhibition of rosette formation and may therefore be negatively affected by blood group O. When  
188 included as a covariate in a reduced Cox regression model, group O blood type affected neither  
189 malaria risk itself nor the association between CIDR $\gamma$ -specific IgG and risk of febrile malaria (**Table**  
190 **S3**). Notably, baseline CIDR $\gamma$ 3-specific IgG reactivity did not significantly correlate with decreased  
191 parasite density at the first malaria episode after controlling for age and the presence of the HbS  
192 allele (data not shown), suggesting that CIDR $\gamma$ -specific IgG may not have anti-parasite activity.  
193 Given the association between CIDR $\gamma$ -specific IgG and delay in malaria fever during the first year  
194 of the study, we specifically examined if CIDR $\gamma$ 3 serostatus at the beginning of each malaria  
195 season affected the risk of recurrent malaria episodes in the 60 children who were longitudinal  
196 evaluated for PfEMP1 IgG responses over five malaria seasons. Presence of CIDR $\gamma$ 3-specific IgG  
197 prior to each season predicted a reduction in febrile malaria episodes even after controlling for  
198 AMA1-specific IgG serostatus and the HbS allele (**Table 2**).

## 199 **DISCUSSION**

200 PfEMP1 variants containing domains of the CIDR $\alpha$ 1 class generally bind to EPCR on  
201 endothelial cells and are associated with severe malaria (10), whereas variants containing  
202 domains of the CIDR $\alpha$ 2-6 classes bind to CD36 present on several host cell types, including  
203 microvascular endothelial cells, mononuclear phagocytes, and platelets (16, 37). Antibodies  
204 targeting these PfEMP1 domains can potentially disrupt adhesion of IEs to host receptors but can  
205 also facilitate IE clearance via opsonization and phagocytosis or antibody-mediated cytotoxicity

206 (10, 38, 39). Consistent with a prior study conducted in a Tanzanian cohort (28), we observed  
207 early acquisition of IgG antibodies against EPCR-binding PfEMP1 variants of the CIDR $\alpha$ 1 domain  
208 class relative to CD36-binding variants in both age-stratified cross-sectional and longitudinal  
209 analyses. This is also consistent with studies that investigated acquisition of antibodies to PfEMP1  
210 classified by upstream sequence group and found that antibodies to DBL and CIDR domains  
211 belonging to group A and B/A are acquired earlier in life than group B and C variants among  
212 individuals living in malaria-endemic settings (26, 40). Importantly, the antigen panel used in the  
213 current study contained unique CIDR domains not covered by these prior studies.

214 Among the 35 distinct CIDR domains evaluated here, CIDR $\alpha$ 1.7(c) elicited the most robust  
215 and prevalent IgG responses in early childhood, eventually approaching 100% seroprevalence in  
216 adolescents and adults in this cohort. Longitudinal analysis to assess hierarchical acquisition  
217 confirmed that IgG antibodies specific for CIDR $\alpha$ 1.7(c) were acquired first, with IgG against the  
218 related CIDR $\alpha$ 1.7(a) variant acquired fourth. Transcripts encoding CIDR $\alpha$ 1.7 domains have been  
219 found to predominate among the most severe cases of pediatric cerebral malaria—those that  
220 lead to brain swelling and death (19). The immunodominance of CIDR $\alpha$ 1.7(c) may be a  
221 consequence of epitopes targeted by cross-reactive CIDR $\alpha$ 1 antibodies (41, 42). Moreover,  
222 PfEMP1 with CIDR $\alpha$ 1.4 and CIDR $\alpha$ 1.7 domains frequently contain ICAM1-binding DBL $\beta$  domains  
223 (43). The dual EPCR- and ICAM1-binding phenotype is thought to be particularly pathogenic, and  
224 antibodies to these DBL $\beta$  domains have been associated with reduced risk of clinical malaria with  
225 parasite densities of  $\geq 10,000$  parasites/ $\mu$ l (44). We also observed early acquisition of IgG specific  
226 for CIDR $\alpha$ 1.8 domains. Expression of these domains, as well as EPCR-binding CIDR $\alpha$ 1 domains in

227 general, is associated with severe malaria including cerebral malaria in African children (18-21,  
228 45) and Indian adults (46).

229 Given that all CIDR $\alpha$ 1 variants have been linked to severe malaria in African children, the early  
230 acquisition of IgG specific to CIDR $\alpha$ 1.7 and CIDR $\alpha$ 1.8 domains may just be a reflection of local  
231 parasite population dynamics rather than enhanced pathogenicity conferred by these specific  
232 CIDR variants. However, the potential lethality of parasites expressing CIDR $\alpha$ 1 in general  
233 underscores why a vigorous host antibody response against these variant domains in early  
234 childhood may be advantageous. This study builds on older work (4, 47, 48) showing an age-  
235 specific acquisition of antibodies to particular parasite strains, and we are able to statistically  
236 confirm this pattern for the first time, and identify key genetic underpinnings of those  
237 observations. We still cannot address the slippery problem of whether this order reflects the  
238 circulation of genotypes with different transmissibility; under this scenario, high fitness  
239 genotypes lead to high prevalence and therefore low age of first infection, and coincidentally  
240 cause more disease in relatively non-immune children compared to low fitness genotypes as a  
241 result. In contrast, it is possible that the ordered expression of PfEMP1 variants across strains,  
242 potentially in response to the immune status of the parasite's immediate host, leads to the  
243 hierarchical acquisition of antibodies observed.

244 Due to the low incidence of severe disease in the cohort, we could not assess the impact of  
245 CIDR $\alpha$ 1.7-specific or CIDR $\alpha$ 1.8-specific antibodies on the risk of severe malaria in the study.  
246 However, when all 35 CIDRs were assessed for association with the prospective risk of  
247 uncomplicated, febrile malaria, IgG specific to CIDR $\gamma$ 3 (IT4var08) was significantly associated with  
248 reduced malaria risk. PfEMP1 variants encoding CIDR $\beta$ , CIDR $\gamma$ , or CIDR $\delta$  domains have been

249 associated with rosetting (11, 46), which can enhance microvasculature obstruction thereby  
250 increasing malaria severity. However, direct evidence that any of these CIDR domains have  
251 intrinsic rosetting properties is lacking (49). Rather, their association with rosetting may be  
252 related to their tandem expression with an adjacent DBL $\alpha$ 1 at the N-terminal head (50). Rosetting  
253 frequency has been correlated with severity of malaria with the highest levels in cerebral malaria  
254 (35, 51, 52) but is still commonly observed in uncomplicated malaria. Thus, the role of rosetting  
255 in severity of malarial disease remains unclear. Nevertheless, disruption of rosettes by targeting  
256 DBL1 $\alpha$  has been used as a vaccine strategy (53), and antibodies to rosetting-associated group 2  
257 DBL $\alpha$  domains predicted protection from uncomplicated malaria, suggesting a protective role for  
258 these antibodies in less severe disease (30, 31). Although speculative, it is possible that naturally  
259 acquired CIDR $\gamma$ -specific IgG confers protection from febrile malaria by blocking rosette  
260 formation. However, this mechanism is not supported by the current study given that the  
261 protection attributable to CIDR $\gamma$ -specific IgG is unchanged after controlling for blood group O,  
262 which has been shown to be protective against severe falciparum malaria through the reduction  
263 of rosetting (36). It also must be noted that reduced malaria risk was not observed for IgG-specific  
264 for variants of the CIDR $\delta$  class, which is also predicted to have rosetting activity. Furthermore, as  
265 CIDR $\gamma$ 3 was the only CIDR $\gamma$  domain variant tested in this study, it remains unknown whether the  
266 protective effect observed here would be generalizable to IgG targeting other CIDR $\gamma$  variants.

267 A limitation of the study is that we did not sequence *var* transcripts from individuals with *P.*  
268 *falciparum* infections in the longitudinal analysis. This may have allowed us to prospectively  
269 assess if seroconversion against specific CIDRs such as CIDR $\alpha$ 1.7, CIDR $\alpha$ 1.8, or CIDR $\gamma$  reliably led  
270 to the absence of parasites expressing the corresponding *var* transcript during clinical malaria

271 episodes. In addition to our limited assessment of CIDR $\gamma$  domains, we also did not evaluate CIDR $\beta$   
272 domains, which also have been associated with the rosetting phenotype.

273 In summary, this longitudinal study provides evidence that acquisition of IgG antibodies to  
274 PfEMP1 variants is ordered and demonstrates that antibodies to CIDR $\alpha$ 1 domains, specifically the  
275 pathogenic domain variants CIDR $\alpha$ 1.7 and CIDR $\alpha$ 1.8, are acquired the earliest in children residing  
276 in an area of intense, seasonal malaria transmission. We also show that IgG antibodies to the  
277 rosetting-associated CIDR $\gamma$ 3 domain is acquired early and is associated with protection from  
278 febrile malaria. Future studies will need to validate these findings in other transmission settings  
279 and determine the functional activity of these naturally acquired CIDR variant-specific antibodies.

## 280 **METHODS**

### 281 **Ethics**

282 The Ethics Committee of the Faculty of Medicine, Pharmacy and Dentistry at the University  
283 of Sciences, Techniques, and Technology of Bamako, and the Institutional Review Board of the  
284 National Institute of Allergy and Infectious Diseases, National Institutes of Health approved this  
285 study (ClinicalTrials.gov identifier: NCT01322581). Written, informed consent was obtained from  
286 the parents or guardians of participating children or from adult participants.

### 287 **Study Site**

288 The study was conducted in the village of Kalifabougou, Mali, which is located 40 km  
289 northwest of Bamako, Mali within the savanna ecoclimatic zone. Within this community,  
290 Bambara is the predominant ethnic group, and ~90% of residents engage in subsistence farming.  
291 Malaria transmission is intense and seasonal, reliably occurring from June through December,  
292 with the vast majority of malaria cases caused by *P. falciparum* (54).

## 293 **Study Population and Study Design**

294 Recruitment and enrollment procedures of participants for this study have been previously  
295 described (55). Briefly, exclusion criteria at enrollment included a hemoglobin level <7 g/dL,  
296 axillary temperature  $\geq 37.5^{\circ}\text{C}$ , acute systemic illness, underlying chronic disease, use of  
297 antimalarial or immunosuppressive medications in the past 30 days, or pregnancy. The study  
298 design and selection of subjects are summarized in **Fig. S1**.

## 299 **Human samples**

300 At the beginning and end of the malaria-transmission season, blood samples were drawn by  
301 venipuncture into sodium-citrate-containing Vacutainer tubes (Becton Dickinson). Plasma was  
302 separated by centrifugation and cryopreserved. Hemoglobin typing was performed using a D-10  
303 instrument (Bio-Rad). Blood for ABO typing was collected in EDTA containing microtainers. ABO  
304 typing was conducted with forward typing using Cypress Diagnostics Reagents. Anti-A, Anti-B,  
305 and Anti-AB IgM reagents were mixed with the sample, and blood type was determined by  
306 agglutination. During the first malaria season, blood was collected by finger-prick onto 903 filter  
307 paper (Whatman) for PCR analysis at each scheduled clinic visit (occurring at 2-week intervals for  
308 7 months) and sick visit for subsequent molecular diagnostics.

## 309 **Diagnosis and Treatment of Infections**

310 **Clinical malaria episodes.** Individuals were initially enrolled in May 2011 and have been  
311 followed continuously since unless withdrawn or lost to follow-up. During the first malaria  
312 season, clinical malaria episodes were detected prospectively by self-referral and weekly active  
313 clinical surveillance visits which alternated between the study clinic and the participants' homes.  
314 Passive malaria surveillance and pre- and post-malaria season cross-sectional surveys have

315 continued during subsequent years. All individuals with signs and symptoms of malaria and any  
316 level of *Plasmodium* parasitemia detected by light microscopy were treated according to the  
317 National Malaria Control Program guidelines in Mali. For the current study, a clinical malaria  
318 episode was defined as any parasitemia on contemporaneous blood smear, an axillary  
319 temperature of  $\geq 37.5^{\circ}\text{C}$  within 24 hours, and no other cause of fever discernible by physical  
320 exam.

321 **Blood smears.** Thick blood smears were stained with Giemsa and counted against 300  
322 leukocytes. Parasite densities were recorded as the number of asexual parasites/ $\mu\text{l}$  of blood  
323 based on a mean leukocyte count of 7500 cells/ $\mu\text{l}$ . Each smear was read in blinded manner by  
324 two certified microscopists of the laboratory team.

325 **Molecular detection.** For each participant, the first *P. falciparum* infection of the initial  
326 malaria season was detected retrospectively by PCR analysis of the longitudinally collected dried  
327 blood spots (54). First malaria episodes were determined from the clinical visit data.

### 328 **Protein Expression and Multiplex Immunoassays**

329 The 35 recombinant His-tagged CIDR domains (Table S1) were expressed in baculovirus-  
330 transfected insect cells, and purified by nickel affinity chromatography as previously described  
331 (28, 42, 56). AMA1, CSP, and MSP1 recombinant proteins were kindly provided by David Narum  
332 (Laboratory of Malaria Immunology and Vaccinology, NIAID, NIH). AMA1 and CSP were expressed  
333 from *P. falciparum* 3D7 in *P. pastoris* as previously described (57, 58). MSP1 was expressed from  
334 *P. falciparum* 3D7 in *Escherichia coli* as previously described (59). Purified tetanus toxoid was  
335 provided the staff at Biologic Laboratories, University of Massachusetts Medical School. Bovine  
336 serum albumin (BSA) was obtained from Sigma. These proteins were coupled to MagPlex-C

337 microspheres (Luminex) and mixed to form a protein bead array in which IgG reactivity to each  
338 antigen could be measured in multiplex, as previously described(60) with minor modifications.  
339 Briefly, plasma samples were diluted 1:500 and 1:2000 (to better assess highly reactive antigens)  
340 in Assay Buffer E (ABE: 0.1% BSA, 0.05% Tween-20 in PBS, pH7.4). For each plate, pooled malaria-  
341 hyperimmune plasma was serially diluted in ABE at 1:50, 1:158, 1:500, 1:1580, 1:5000, 1:1580,  
342 1:50000, and 1:158000 to generate an 8-point dilutional standard curve. 50  $\mu$ l of beads and 50  $\mu$ l  
343 of diluted plasma was added to 96-well microtiter plates (MSBVS 1210, Millipore, USA) pre-  
344 wetted with ABE. 50  $\mu$ l of phycoerythrin-conjugated Goat Anti-Human IgG (Jackson  
345 ImmunoResearch Laboratories), diluted 1:3000 was added, and mean fluorescent intensities  
346 were measured using the Luminex 200 system. To account for plate-to-plate variation,  
347 fluorescence intensities were normalized using the median reactivity for each antigen on each  
348 plate. Normalized intensities were then scaled to the mean reactivity for each antigen to allow  
349 comparison between antigens. Using the ncal function within the nCal package(61), IgG  
350 concentrations were interpolated from the standard curves generated from serial diluted pooled  
351 malaria-immune plasma and the resulting concentrations reported as arbitrary units (AU), which  
352 was used for statistical analyses and visualization.

### 353 **Ordered Acquisition Analysis**

354 If seroconversion to CIDR domains occurs in a stereotypical order, then each individual's  
355 sequence of seroconversions in this longitudinal study should be congruent with that order. Of  
356 course, we do not know such an order *a priori*, so we find it by searching over all orderings to  
357 find the one that minimizes the number of order-violating seroconversions. This *minimum*  
358 *violations ranking* (MVR) consists of both the ordinal ranking itself and a corresponding number



359 of rank violations  $v$ . These outputs can be visualized by plotting a heatmap, with indices ordered  
360 by the minimizing ranking as in Fig. 3A. Clear triangular structure indicates the strength of the  
361 ordering, and  $v$  is equal to the sum of the sparser triangle.

362 Note that the more that individuals' seroconversions occur strictly in their rank order, the  
363 smaller  $v$  will be. In this way, the number of violations  $v$  provides a convenient test statistic for a  
364 standard one-tailed p-value test: our null hypothesis is that there is no meaningful order to  
365 seroconversions, and thus, randomly permuting the order of seroconversions for each individual  
366 and recomputing  $v$  should make no difference. In other words, the null hypothesis is that the  
367 number of violations  $v$  in the real data is statistically indistinguishable from the number of  
368 violations in the time-randomized data  $v_{\text{random}}$ . The p-value can be computed then as  $p = \Pr(v <$   
369  $v_{\text{random}})$ . When actual seroconversions are significantly more orderable than random  
370 seroconversions (while preserving the seroconversion counts per individual and seroconversions  
371 per CIDR domain), it indicates the presence of a statistically significant stereotypical ordering, as  
372 in Fig. 3B.

373 Computations were performed according to the following details. Let matrix entry  $A_{ij}$  be the  
374 number of times, over each individual, that a seroconversion to  $i$  was observed prior to a  
375 seroconversion to  $j$ . If the matrix's rows and columns are sorted according to some re-ordering  $r$ ,  
376 then the number of violations  $v$  can be computed as the sum of the lower triangle of  $A(r)$ . Finding  
377 the  $r$  that minimizes  $v$  can be done by beginning from a random  $r$ , and then sequentially proposing  
378 swaps of pairs of indices in which any swap that increases  $v$  is rejected and otherwise swaps are  
379 accepted. This MVR algorithm exits after a large number of proposed swaps have been rejected  
380 without any decrease in  $v$ , and the output is both  $v$  and the order of seroconversion that

381 corresponds to that v. Permutation tests were then performed by shuffling the seroconversions  
382 and years, independently for each individual, and then applying the computation above.

### 383 **Statistical Analysis**

384 The use of specific statistical tests and methods are indicated in the Results and/or figure  
385 legends. Statistical significance was defined as a 2-tailed P value of <.05. Analyses were  
386 performed in R version 3.6.1 (<http://www.R-project.org>). Plots were generated with the *ggplot2*  
387 package. Cox regression was performed using the *survival* and *glmnet* packages. For the time to  
388 febrile malaria analysis (Table 1), variable selection from among the 35 CIDR seropositivity  
389 variables, age, gender, AMA1 seroreactivity, and the presence of the HbS allele was determined  
390 using regularized Cox regression fit with the least absolute shrinkage and selection operator  
391 (LASSO) penalty using 10-fold cross validation with 1000 iterations (62). The follow-up period  
392 after initial blood-stage infection was 60 days. For the final Cox regression model, age, gender,  
393 and the presence of the HbS allele were included as co-variates along with the LASSO-selected  
394 CIDR variables. For the recurrent event analysis, the Andersen-Gill extension of the Cox  
395 regression model was used to determine the relative risk of malaria over five malaria seasons  
396 using presence of the HbS allele as a covariate and AMA1-specific IgG seropositivity (a surrogate  
397 for overall malaria exposure) and CIDRy3-specific IgG seropositivity as time-dependent covariates  
398 that varied over each season.

399

400 **Acknowledgments**

401 We thank all the participants in the Kalifabougou cohort and the field team for making this study  
402 possible. We also thank David Narum (Laboratory of Malaria Immunology and Vaccinology,  
403 NIAID, NIH) for providing the recombinant AMA1, CSP, and MSP1 proteins and Chiung-Yu Huang  
404 (University of California, San Francisco) for her critical review and suggestions regarding the  
405 survival and recurrent event analysis. The staff at Biologic Laboratories, University of  
406 Massachusetts Medical School at Jamaica Plains, MA generously provided the purified tetanus  
407 toxoid.

408 **Funding**

409 This project was supported with federal funds from the Division of Intramural Research, National  
410 Institute of Allergy and Infectious Diseases (NIAID), National Institutes of Health, Department of  
411 Health and Human Services. T.M.T. was also supported by K08AI125682 (NIAID) and the Doris  
412 Duke Charitable Foundation Clinical Scientist Development Award.

413 **Author Contributions**

414 NO, LHM, SKP, LT, TL, PDC, and TMT conceived the study. AO, SD, KK, and BT were responsible  
415 for the cohort study and collection of samples. NO, LT, SL, and TBY conducted the experiments.  
416 NO, DBL, and TMT analyzed the data. TMT, TL, CB, DBL, and PDC wrote the manuscript with  
417 contributions from NO, LT, LHM, and SKP. All authors read and approved the manuscript.

**Fig. 1. IgG antibodies to PfEMP-1 variants belonging to the A or B/A groups or having the EPCR-binding phenotype are rapidly acquired during childhood.**

**a** Hierarchical clustering heatmap showing IgG reactivity to each of the 35 PfEMP-1 variants in 680 subjects at enrollment (May 2011 healthy baseline). Clustering was performed using the Ward.D method and the Pearson distance metric. AU refers to arbitrary concentration units, which was calculated by fitting data to a dilutional standard curve of pooled hyper-immune plasma from malaria-exposed Malian adults. **b-c** IgG reactivity obtained at May 2011 healthy baseline versus age for each PfEMP-1 variant (solid lines) or grouped by CIDR domain class (dashed lines) with loess fit curves and 95% confidence intervals. Control antigens shown as dotted colored lines. **d** Linear portion of plot in **b** (age range 3 months to 8 years) with linear fit curves and 95% confidence intervals (see Table S2). For comparison, regression line for all variants together is represented by the black dotted line.

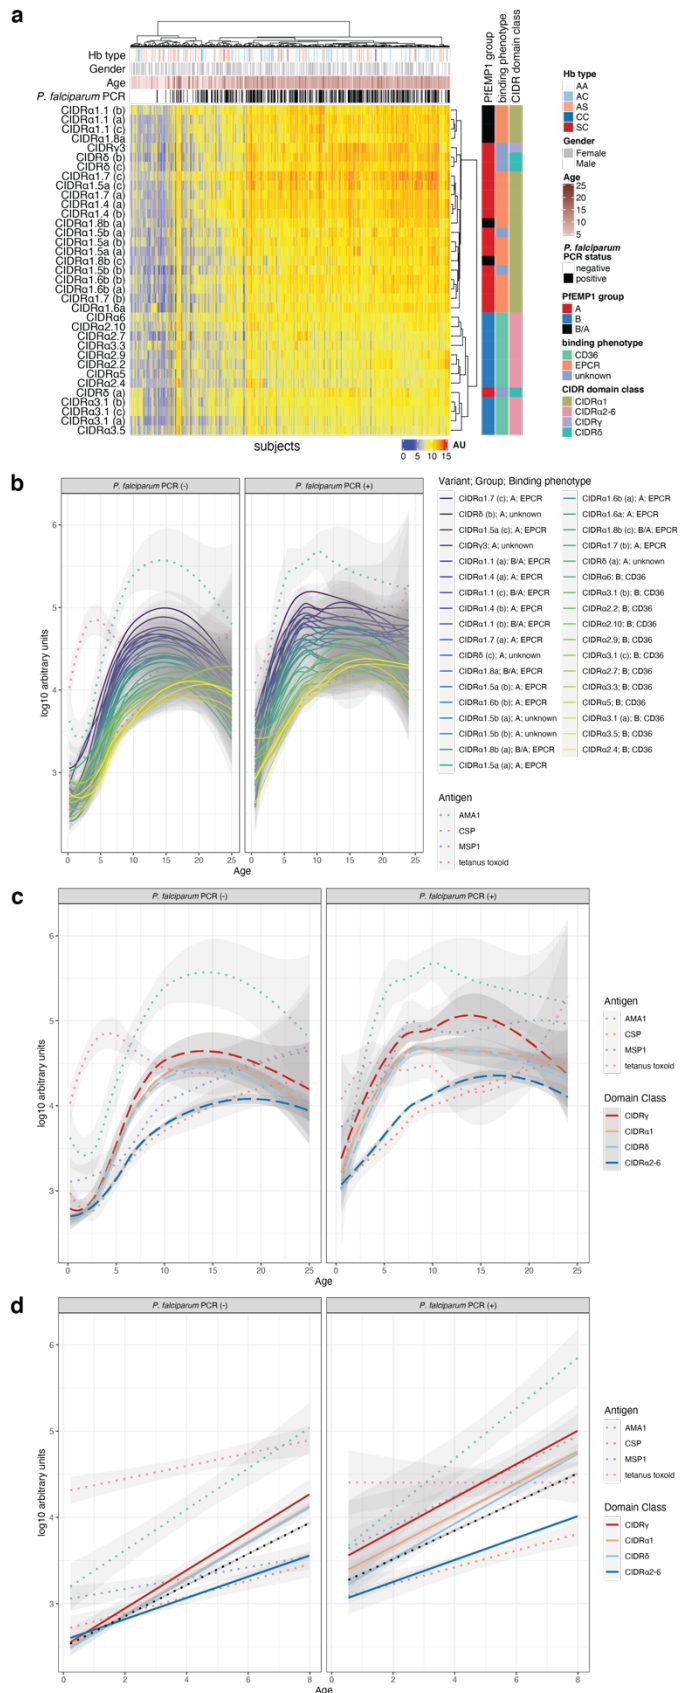

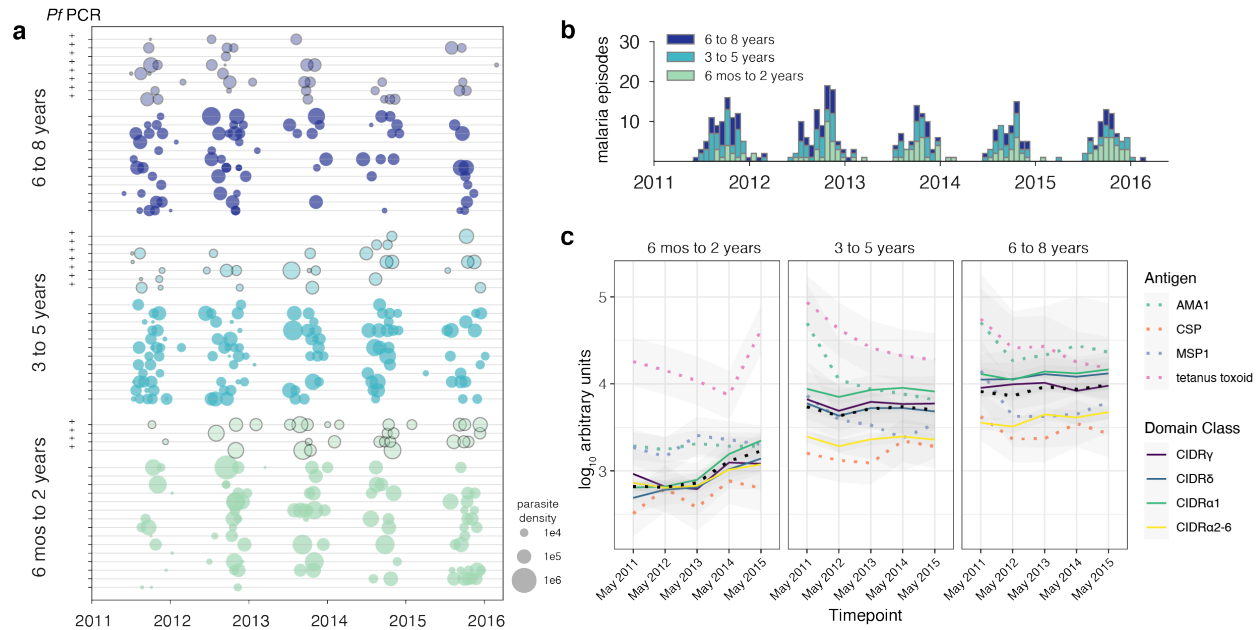

419

420 **Fig. 2. Longitudinal analysis of PfEMP-1 variant-specific IgG over multiple malaria seasons.**

421

422 IgG reactivity specific to PfEMP-1 variants was determined for 60 children ages 6 months to 8 years (see  
 423 **Figure S1**) at five cross-sectional surveys prior to the malaria season. **a** Malaria incidence over five malaria  
 424 seasons for 60 children in children aged 6 months to 2 years; 3 to 5 years; and 6 to 8 years ( $n = 20$  per age  
 425 group). Plus (+) signs in the left margin indicate subjects with asymptomatic *P. falciparum* parasitemia at  
 426 enrollment. Size of bubble is proportional to parasite density determined at each visit. **b** Number of  
 427 malaria episodes per two-week period by age group over five malaria seasons. **c** Longitudinal IgG reactivity  
 428 at five cross-sectional surveys in the same children. Color scale for variant is ordered by slopes estimated  
 429 from cross-sectional data (**Table S2**) to facilitate comparison.

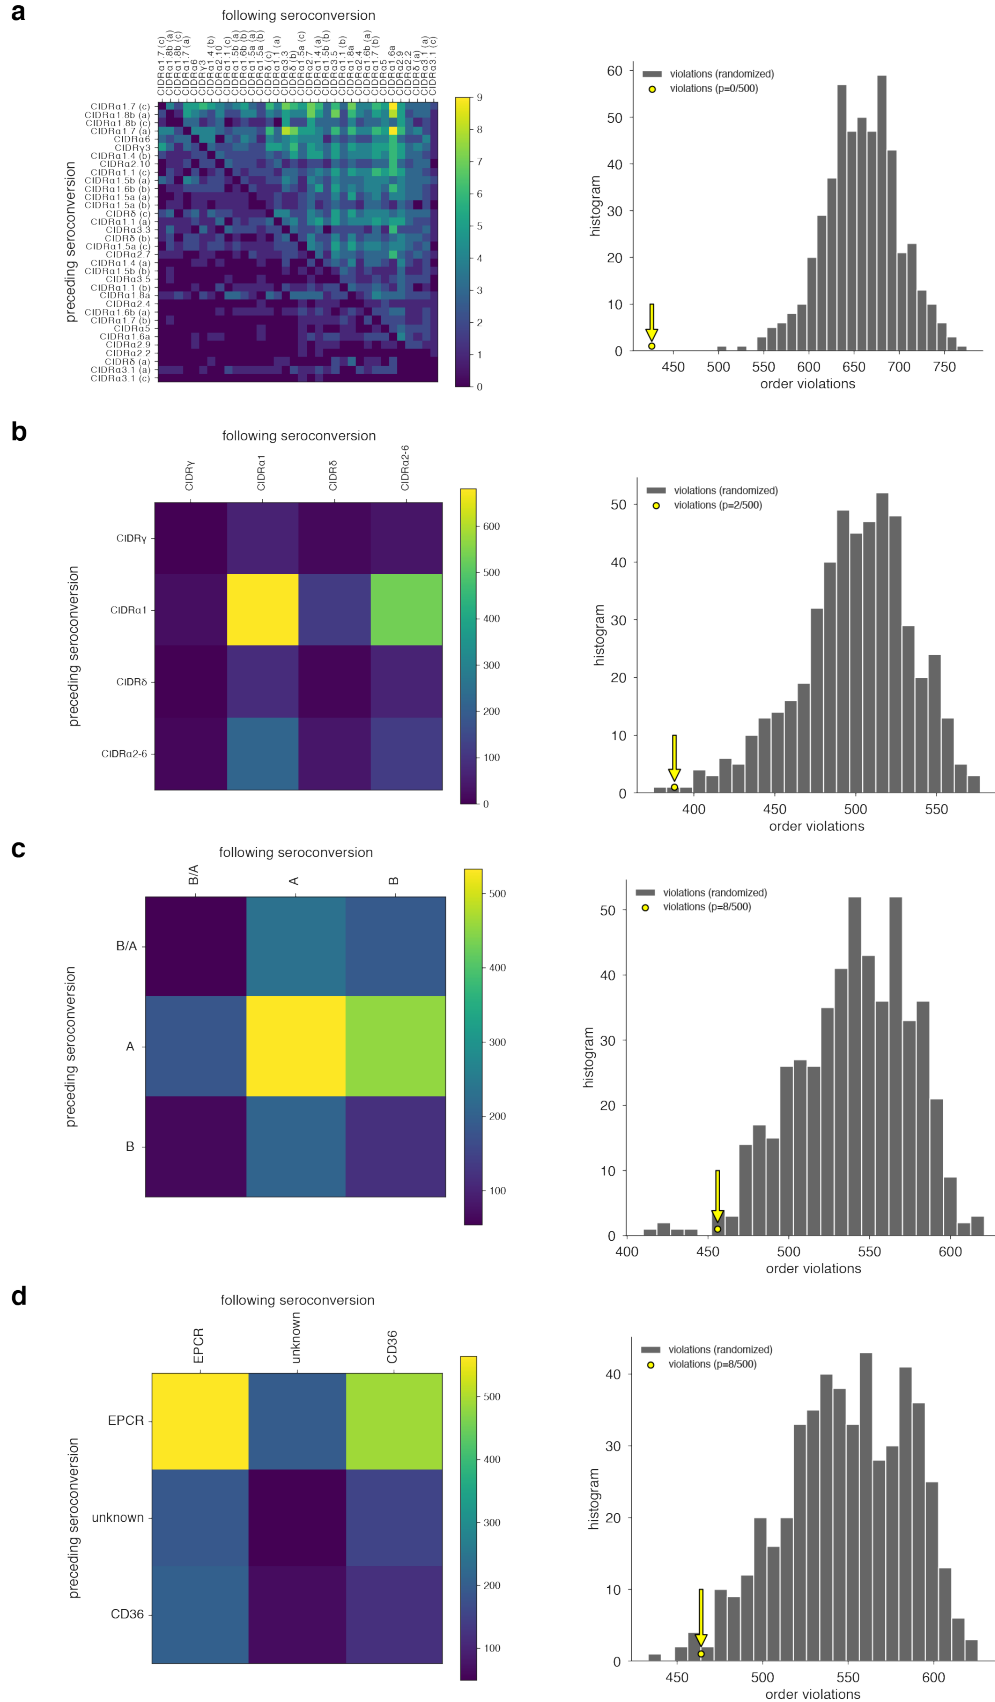

431 **Fig. 3. Acquisition of IgG to PfEMP-1 variants over time is hierarchical.**

432 Using longitudinal data, seropositivity was determined for each variant within each subject at each time  
433 point to determine the year of seroconversion. Seroconversion year was then used to generate a matrix  
434 representing the number of times that seroconversion for a variant (rows) precedes another variant  
435 (column) across all subjects. To find consensus ordering, the matrix was sorted to minimize the number  
436 of violations. Observed consensus ordering was compared against 200 independent procedures in which  
437 the seroconversion orders for each subject was randomized and consensus ordering was carry out in the  
438 same manner (right panel). Analysis was performed at the level of **a** individual variants, **b** CIDR domain  
439 class, **c** upstream sequence group, and **d** binding phenotype.

440 **Table 1. Relationship between CIDR variant seropositivity and protection from febrile malaria.**  
441

| Variant               | Number seropositive (N=271) | Alternate name | PfEMP1 group | Binding Phenotype | Genome/ Isolate | HR    | LCI    | UCI   | P value |
|-----------------------|-----------------------------|----------------|--------------|-------------------|-----------------|-------|--------|-------|---------|
| CIDR $\gamma$ 3       | 129                         | IT4var08       | A            | unknown           | IT4             | 0.607 | 0.42   | 0.876 | 0.00763 |
| CIDR $\alpha$ 3.1 (a) | 17                          | DD2var01       | B            | CD36              | DD2             | 0.208 | 0.0523 | 0.828 | 0.0259  |
| CIDR $\alpha$ 3.3     | 55                          | IT4var26       | B            | CD36              | IT4             | 0.806 | 0.458  | 1.42  | 0.454   |
| CIDR $\alpha$ 2.10    | 37                          | IT4var30       | B            | CD36              | IT4             | 0.861 | 0.507  | 1.46  | 0.58    |
| CIDR $\alpha$ 2.9     | 25                          | IT4var45       | B            | CD36              | IT4             | 0.83  | 0.429  | 1.6   | 0.58    |

442  
443 Results of Cox regression model assessing PfEMP1 variant-specific IgG on the risk of febrile malaria after  
444 incident *P. falciparum* infection in which covariates were age, gender, presence of the HbS allele, and IgG  
445 seropositivity for five CIDR variants selected using the least absolute shrinkage and selection operator  
446 (LASSO; refer to Methods). Analysis was restricted to subjects who were at least 6 months of age and  
447 began the study negative for *P. falciparum* infection by PCR (271 subjects). Malaria risk was determined  
448 based on time to clinical malaria, defined as axillary temperature >37.5 degrees C and any parasitemia,  
449 after PCR-documented blood-stage infection (163 malaria events). Follow-up time was limited to 60 days  
450 from initial blood-stage infection. Results are ordered by increasing P values. HR = hazard ratio; LCI = lower  
451 95% confidence interval; UCI = upper 95% confidence interval.



452 **Table 2. Relationship between CIDR $\gamma$ 3 seropositivity and protection from recurrent malaria episodes.**  
453

| Variable                     | RR    | LCI   | UCI   | P value  |
|------------------------------|-------|-------|-------|----------|
| CIDR $\gamma$ 3 seropositive | 0.652 | 0.486 | 0.875 | 0.00433  |
| AMA1 seropositive            | 1.14  | 0.862 | 1.51  | 0.355    |
| HbS allele                   | 0.437 | 0.309 | 0.619 | 2.99E-06 |

454  
455 Results of the Andersen-Gill extension of the Cox regression model to assess the relationship between  
456 CIDR $\gamma$ 3-specific IgG seropositivity and the risk of recurrent febrile malaria episodes (defined as fever  
457 >37.5°C and any parasitemia; 376 events) in 60 children who were followed longitudinally over five  
458 malaria transmission seasons from 2011 through 2015. Presence of the HbS allele and AMA1  
459 seropositivity, a surrogate for overall malaria exposure, were included as covariates. CIDR $\gamma$ 3-specific and  
460 AMA1-specific IgG seropositivity were treated as time-dependent covariates that varied over each season.  
461 RR = relative risk; LCI = lower 95% confidence interval; UCI = upper 95% confidence interval.

## 462 References

- 463
- 464 1. World Health Organization. *World Malaria Report 2019*. World Health Organization;  
465 2019.
  - 466 2. Jensen AR, Adams Y, and Hviid L. Cerebral Plasmodium falciparum malaria: The role of  
467 PfEMP1 in its pathogenesis and immunity, and PfEMP1-based vaccines to prevent it.  
468 *Immunol Rev*. 2019.
  - 469 3. Baruch DI, Pasloske BL, Singh HB, Bi X, Ma XC, Feldman M, et al. Cloning the P. falciparum  
470 gene encoding PfEMP1, a malarial variant antigen and adherence receptor on the surface  
471 of parasitized human erythrocytes. *Cell*. 1995;82(1):77-87.
  - 472 4. Bull PC, Lowe BS, Kortok M, Molyneux CS, Newbold CI, and Marsh K. Parasite antigens on  
473 the infected red cell surface are targets for naturally acquired immunity to malaria. *Nat*  
474 *Med*. 1998;4(3):358-60.
  - 475 5. Chan JA, Howell KB, Reiling L, Ataide R, Mackintosh CL, Fowkes FJ, et al. Targets of  
476 antibodies against Plasmodium falciparum-infected erythrocytes in malaria immunity. *J*  
477 *Clin Invest*. 2012;122(9):3227-38.
  - 478 6. Su XZ, Heatwole VM, Wertheimer SP, Guinet F, Herrfeldt JA, Peterson DS, et al. The large  
479 diverse gene family var encodes proteins involved in cytoadherence and antigenic  
480 variation of Plasmodium falciparum-infected erythrocytes. *Cell*. 1995;82(1):89-100.
  - 481 7. Gardner MJ, Hall N, Fung E, White O, Berriman M, Hyman RW, et al. Genome sequence  
482 of the human malaria parasite Plasmodium falciparum. *Nature*. 2002;419(6906):498-511.
  - 483 8. Chen Q, Fernandez V, Sundstrom A, Schlichtherle M, Datta S, Hagblom P, et al.  
484 Developmental selection of var gene expression in Plasmodium falciparum. *Nature*.  
485 1998;394(6691):392-5.
  - 486 9. Smith JD, Chitnis CE, Craig AG, Roberts DJ, Hudson-Taylor DE, Peterson DS, et al. Switches  
487 in expression of Plasmodium falciparum var genes correlate with changes in antigenic and  
488 cytoadherent phenotypes of infected erythrocytes. *Cell*. 1995;82(1):101-10.
  - 489 10. Turner L, Lavstsen T, Berger SS, Wang CW, Petersen JE, Avril M, et al. Severe malaria is  
490 associated with parasite binding to endothelial protein C receptor. *Nature*.  
491 2013;498(7455):502-5.
  - 492 11. Smith JD, Rowe JA, Higgins MK, and Lavstsen T. Malaria's deadly grip: cytoadhesion of  
493 Plasmodium falciparum-infected erythrocytes. *Cell Microbiol*. 2013;15(12):1976-83.
  - 494 12. Rask TS, Hansen DA, Theander TG, Gorm Pedersen A, and Lavstsen T. Plasmodium  
495 falciparum erythrocyte membrane protein 1 diversity in seven genomes--divide and  
496 conquer. *PLoS Comput Biol*. 2010;6(9).
  - 497 13. Otto T, Assefa S, B<sup>h</sup>me U, Sanders M, Kwiatkowski D, null n, et al. Evolutionary analysis  
498 of the most polymorphic gene family in falciparum malaria [version 1; peer review: 1  
499 approved, 1 approved with reservations]. *Wellcome Open Research*. 2019;4(193).
  - 500 14. Fried M, and Duffy PE. Adherence of Plasmodium falciparum to chondroitin sulfate A in  
501 the human placenta. *Science*. 1996;272(5267):1502-4.
  - 502 15. Buffet PA, Gamain B, Scheidig C, Baruch D, Smith JD, Hernandez-Rivas R, et al. Plasmodium  
503 falciparum domain mediating adhesion to chondroitin sulfate A: a receptor for human  
504 placental infection. *Proc Natl Acad Sci U S A*. 1999;96(22):12743-8.

- 505 16. Robinson BA, Welch TL, and Smith JD. Widespread functional specialization of  
506 Plasmodium falciparum erythrocyte membrane protein 1 family members to bind CD36  
507 analysed across a parasite genome. *Mol Microbiol.* 2003;47(5):1265-78.
- 508 17. Lavstsen T, Salanti A, Jensen AT, Arnot DE, and Theander TG. Sub-grouping of Plasmodium  
509 falciparum 3D7 var genes based on sequence analysis of coding and non-coding regions.  
510 *Malar J.* 2003;2:27.
- 511 18. Jespersen JS, Wang CW, Mkumbaye SI, Minja DT, Petersen B, Turner L, et al. Plasmodium  
512 falciparum var genes expressed in children with severe malaria encode CIDRalpha1  
513 domains. *EMBO Mol Med.* 2016;8(8):839-50.
- 514 19. Kessler A, Dankwa S, Bernabeu M, Harawa V, Danziger SA, Duffy F, et al. Linking EPCR-  
515 Binding PfEMP1 to Brain Swelling in Pediatric Cerebral Malaria. *Cell host & microbe.*  
516 2017;22(5):601-14 e5.
- 517 20. Mkumbaye SI, Wang CW, Lyimo E, Jespersen JS, Manjurano A, Mosha J, et al. The Severity  
518 of Plasmodium falciparum Infection Is Associated with Transcript Levels of var Genes  
519 Encoding Endothelial Protein C Receptor-Binding P. falciparum Erythrocyte Membrane  
520 Protein 1. *Infect Immun.* 2017;85(4).
- 521 21. Shabani E, Hanisch B, Opoka RO, Lavstsen T, and John CC. Plasmodium falciparum EPCR-  
522 binding PfEMP1 expression increases with malaria disease severity and is elevated in  
523 retinopathy negative cerebral malaria. *BMC Med.* 2017;15(1):183.
- 524 22. Cabrera A, Neculai D, and Kain KC. CD36 and malaria: friends or foes? A decade of data  
525 provides some answers. *Trends Parasitol.* 2014;30(9):436-44.
- 526 23. Ochola LB, Siddondo BR, Ocholla H, Nkya S, Kimani EN, Williams TN, et al. Specific receptor  
527 usage in Plasmodium falciparum cytoadherence is associated with disease outcome. *PLoS*  
528 *One.* 2011;6(3):e14741.
- 529 24. Gupta S, Snow RW, Donnelly CA, Marsh K, and Newbold C. Immunity to non-cerebral  
530 severe malaria is acquired after one or two infections. *Nat Med.* 1999;5(3):340-3.
- 531 25. Wahlgren M, Goel S, and Akhouri RR. Variant surface antigens of Plasmodium falciparum  
532 and their roles in severe malaria. *Nat Rev Microbiol.* 2017;15(8):479-91.
- 533 26. Cham GK, Turner L, Kurtis JD, Mutabingwa T, Fried M, Jensen AT, et al. Hierarchical,  
534 domain type-specific acquisition of antibodies to Plasmodium falciparum erythrocyte  
535 membrane protein 1 in Tanzanian children. *Infect Immun.* 2010;78(11):4653-9.
- 536 27. Duffy MF, Noviyanti R, Tsuboi T, Feng ZP, Trianty L, Sebayang BF, et al. Differences in  
537 PfEMP1s recognized by antibodies from patients with uncomplicated or severe malaria.  
538 *Malaria journal.* 2016;15(1):258.
- 539 28. Turner L, Lavstsen T, Mmbando BP, Wang CW, Magistrado PA, Vestergaard LS, et al. IgG  
540 antibodies to endothelial protein C receptor-binding cysteine-rich interdomain region  
541 domains of Plasmodium falciparum erythrocyte membrane protein 1 are acquired early  
542 in life in individuals exposed to malaria. *Infect Immun.* 2015;83(8):3096-103.
- 543 29. Rambhatla JS, Turner L, Manning L, Laman M, Davis TME, Beeson JG, et al. Acquisition of  
544 Antibodies Against Endothelial Protein C Receptor-Binding Domains of Plasmodium  
545 falciparum Erythrocyte Membrane Protein 1 in Children with Severe Malaria. *J Infect Dis.*  
546 2019;219(5):808-18.

- 547 30. Tessema SK, Nakajima R, Jasinskas A, Monk SL, Lekieffre L, Lin E, et al. Protective Immunity  
548 against Severe Malaria in Children Is Associated with a Limited Repertoire of Antibodies  
549 to Conserved PfEMP1 Variants. *Cell Host Microbe*. 2019;26(5):579-90 e5.
- 550 31. Bull PC, Berriman M, Kyes S, Quail MA, Hall N, Kortok MM, et al. Plasmodium falciparum  
551 variant surface antigen expression patterns during malaria. *PLoS Pathog*. 2005;1(3):e26.
- 552 32. Tran TM, Ongoiba A, Coursen J, Crosnier C, Diouf A, Huang CY, et al. Naturally acquired  
553 antibodies specific for Plasmodium falciparum reticulocyte-binding protein homologue 5  
554 inhibit parasite growth and predict protection from malaria. *J Infect Dis*. 2014;209(5):789-  
555 98.
- 556 33. Bustamante LY, Powell GT, Lin YC, Macklin MD, Cross N, Kemp A, et al. Synergistic malaria  
557 vaccine combinations identified by systematic antigen screening. *Proc Natl Acad Sci U S*  
558 *A*. 2017;114(45):12045-50.
- 559 34. Weiss GE, Traore B, Kayentao K, Ongoiba A, Doumbo S, Doumtable D, et al. The  
560 Plasmodium falciparum-specific human memory B cell compartment expands gradually  
561 with repeated malaria infections. *PLoS Pathog*. 2010;6(5):e1000912.
- 562 35. Doumbo OK, Thera MA, Kone AK, Raza A, Tempest LJ, Lyke KE, et al. High levels of  
563 Plasmodium falciparum rosetting in all clinical forms of severe malaria in African children.  
564 *Am J Trop Med Hyg*. 2009;81(6):987-93.
- 565 36. Rowe JA, Handel IG, Thera MA, Deans AM, Lyke KE, Kone A, et al. Blood group O protects  
566 against severe Plasmodium falciparum malaria through the mechanism of reduced  
567 rosetting. *Proc Natl Acad Sci U S A*. 2007;104(44):17471-6.
- 568 37. Silverstein RL, and Febbraio M. CD36, a scavenger receptor involved in immunity,  
569 metabolism, angiogenesis, and behavior. *Sci Signal*. 2009;2(72):re3.
- 570 38. Chan JA, Stanisic DI, Duffy MF, Robinson LJ, Lin E, Kazura JW, et al. Patterns of protective  
571 associations differ for antibodies to P. falciparum-infected erythrocytes and merozoites  
572 in immunity against malaria in children. *Eur J Immunol*. 2017;47(12):2124-36.
- 573 39. Arora G, Hart GT, Manzella-Lapeira J, Doritchamou JY, Narum DL, Thomas LM, et al. NK  
574 cells inhibit Plasmodium falciparum growth in red blood cells via antibody-dependent  
575 cellular cytotoxicity. *eLife*. 2018;7.
- 576 40. Cham GK, Turner L, Lusingu J, Vestergaard L, Mmbando BP, Kurtis JD, et al. Sequential,  
577 ordered acquisition of antibodies to Plasmodium falciparum erythrocyte membrane  
578 protein 1 domains. *J Immunol*. 2009;183(5):3356-63.
- 579 41. Turner L, Theander TG, and Lavstsen T. Immunization with Recombinant Plasmodium  
580 falciparum Erythrocyte Membrane Protein 1 CIDRalpha1 Domains Induces Domain  
581 Subtype Inhibitory Antibodies. *Infect Immun*. 2018;86(11).
- 582 42. Lau CK, Turner L, Jespersen JS, Lowe ED, Petersen B, Wang CW, et al. Structural  
583 conservation despite huge sequence diversity allows EPCR binding by the PfEMP1 family  
584 implicated in severe childhood malaria. *Cell Host Microbe*. 2015;17(1):118-29.
- 585 43. Lennartz F, Adams Y, Bengtsson A, Olsen RW, Turner L, Ndam NT, et al. Structure-Guided  
586 Identification of a Family of Dual Receptor-Binding PfEMP1 that Is Associated with  
587 Cerebral Malaria. *Cell Host Microbe*. 2017;21(3):403-14.
- 588 44. Tessema SK, Utama D, Chesnokov O, Hodder AN, Lin CS, Harrison GLA, et al. Antibodies  
589 to Intercellular Adhesion Molecule 1-Binding Plasmodium falciparum Erythrocyte

- 590 Membrane Protein 1-DBLbeta Are Biomarkers of Protective Immunity to Malaria in a  
591 Cohort of Young Children from Papua New Guinea. *Infect Immun.* 2018;86(8).
- 592 45. Storm J, Jespersen JS, Seydel KB, Szeszak T, Mbewe M, Chisala NV, et al. Cerebral malaria  
593 is associated with differential cytoadherence to brain endothelial cells. *EMBO Mol Med.*  
594 2019;11(2).
- 595 46. Bernabeu M, Danziger SA, Avril M, Vaz M, Babar PH, Brazier AJ, et al. Severe adult malaria  
596 is associated with specific PfEMP1 adhesion types and high parasite biomass. *Proceedings*  
597 *of the National Academy of Sciences of the United States of America.* 2016;113(23):E3270-  
598 9.
- 599 47. Gupta S, and Day KP. A theoretical framework for the immunoepidemiology of  
600 Plasmodium falciparum malaria. *Parasite Immunol.* 1994;16(7):361-70.
- 601 48. Bull PC, Lowe BS, Kortok M, and Marsh K. Antibody recognition of Plasmodium falciparum  
602 erythrocyte surface antigens in Kenya: evidence for rare and prevalent variants. *Infect*  
603 *Immun.* 1999;67(2):733-9.
- 604 49. Rowe JA, Moulds JM, Newbold CI, and Miller LH. P. falciparum rosetting mediated by a  
605 parasite-variant erythrocyte membrane protein and complement-receptor 1. *Nature.*  
606 1997;388(6639):292-5.
- 607 50. Ghumra A, Semblat JP, Ataide R, Kifude C, Adams Y, Claessens A, et al. Induction of strain-  
608 transcending antibodies against Group A PfEMP1 surface antigens from virulent malaria  
609 parasites. *PLoS Pathog.* 2012;8(4):e1002665.
- 610 51. Carlson J, Helmsby H, Hill AV, Brewster D, Greenwood BM, and Wahlgren M. Human  
611 cerebral malaria: association with erythrocyte rosetting and lack of anti-rosetting  
612 antibodies. *Lancet.* 1990;336(8729):1457-60.
- 613 52. Ho M, Davis TM, Silamut K, Bunnag D, and White NJ. Rosette formation of Plasmodium  
614 falciparum-infected erythrocytes from patients with acute malaria. *Infect Immun.*  
615 1991;59(6):2135-9.
- 616 53. Chen Q, Pettersson F, Vogt AM, Schmidt B, Ahuja S, Liljestrom P, et al. Immunization with  
617 PfEMP1-DBL1alpha generates antibodies that disrupt rosettes and protect against the  
618 sequestration of Plasmodium falciparum-infected erythrocytes. *Vaccine.* 2004;22(21-  
619 22):2701-12.
- 620 54. Tran TM, Li S, Doumbo S, Doumtabe D, Huang CY, Dia S, et al. An intensive longitudinal  
621 cohort study of Malian children and adults reveals no evidence of acquired immunity to  
622 Plasmodium falciparum infection. *Clinical infectious diseases : an official publication of*  
623 *the Infectious Diseases Society of America.* 2013;57(1):40-7.
- 624 55. Doumbo S, Tran TM, Sangala J, Li S, Doumtabe D, Kone Y, et al. Co-infection of long-term  
625 carriers of Plasmodium falciparum with Schistosoma haematobium enhances protection  
626 from febrile malaria: a prospective cohort study in Mali. *PLoS Negl Trop Dis.*  
627 2014;8(9):e3154.
- 628 56. Hsieh FL, Turner L, Bolla JR, Robinson CV, Lavstsen T, and Higgins MK. The structural basis  
629 for CD36 binding by the malaria parasite. *Nature communications.* 2016;7:12837.
- 630 57. Plassmeyer ML, Reiter K, Shimp RL, Jr., Kotova S, Smith PD, Hurt DE, et al. Structure of the  
631 Plasmodium falciparum circumsporozoite protein, a leading malaria vaccine candidate. *J*  
632 *Biol Chem.* 2009;284(39):26951-63.

- 633 58. Ellis RD, Wu Y, Martin LB, Shaffer D, Miura K, Aebig J, et al. Phase 1 study in malaria naive  
634 adults of BSAM2/Alhydrogel(R)+CPG 7909, a blood stage vaccine against *P. falciparum*  
635 malaria. *PLoS One*. 2012;7(10):e46094.
- 636 59. Shimp RL, Jr., Martin LB, Zhang Y, Henderson BS, Duggan P, MacDonald NJ, et al.  
637 Production and characterization of clinical grade *Escherichia coli* derived *Plasmodium*  
638 *falciparum* 42 kDa merozoite surface protein 1 (MSP1(42)) in the absence of an affinity  
639 tag. *Protein Expr Purif*. 2006;50(1):58-67.
- 640 60. Cham GK, Kurtis J, Lusingu J, Theander TG, Jensen AT, and Turner L. A semi-automated  
641 multiplex high-throughput assay for measuring IgG antibodies against *Plasmodium*  
642 *falciparum* erythrocyte membrane protein 1 (PfEMP1) domains in small volumes of  
643 plasma. *Malar J*. 2008;7:108.
- 644 61. Fong Y, Sebestyen K, Yu X, Gilbert P, and Self S. nCal: an R package for non-linear  
645 calibration. *Bioinformatics*. 2013;29(20):2653-4.
- 646 62. Simon N, Friedman J, Hastie T, and Tibshirani R. A Sparse-Group Lasso. *Journal of*  
647 *Computational and Graphical Statistics*. 2013;22(2):231-45.  
648
